# Supplementary material
Source: MDPI journal article supplement (https://www.mdpi.com/1424-2818/13/2/60)
Supplement: s1 [file s1]

## Sheet: Database
Family	Taxon	Authority	Type locality	Biogeographic region	Depth	Habitat
Alvinellidae	Alvinella caudata	Desbruyères & Laubier, 1986	East Pacific Rise, 20°50'0"N 109°6'1.1"W	Tropical Eastern Pacific	2593 m	Hydrothermal vents
	Alvinella pompejana	Desbruyères & Laubier, 1980	East Pacific Rise, 20°50'0"N 109°6'1.1"W	Tropical Eastern Pacific	2593 m	Hydrothermal vents
	Paralvinella bactericola	Desbruyères & Laubier, 1991	Guaymas Basin, 27°0'35"N 111°24'58"W	Temperate Northern Pacific	2009 m	Hydrothermal vents
	Paralvinella dela	Detinova, 1988	Juan de Fuca Ridge	Temperate Northern Pacific	1565 m	Hydrothermal vents
	Paralvinella fijiensis	Desbruyères & Laubier, 1993	North-Fiji Basin	Central Indo-Pacific	2000 m	Hydrothermal vents
	Paralvinella grasslei	Desbruyères & Laubier, 1982	East Pacific Rise, 20°50'0"N 109°6'1.1"W	Tropical Eastern Pacific	2451 m	Hydrothermal vents
	Paralvinella hessleri	Desbruyères & Laubier, 1989	Mariana Back-Arc Basin	Central Indo-Pacific	3595 m	Hydrothermal vents
	Paralvinella palmiformis	Desbruyères & Laubier, 1986	Juan de Fuca Ridge	Temperate Northern Pacific	1587 m	Hydrothermal vents
	Paralvinella pandorae	Desbruyères & Laubier, 1986	Juan de Fuca Ridge	Temperate Northern Pacific	1592 m	Hydrothermal vents
	Paralvinella pandorae irlandei	Desbruyères & Laubier, 1986	East Pacific Rise, 13˚N	Tropical Eastern Pacific	2630 m	Hydrothermal vents
	Paralvinella sulfincola	Desbruyères & Laubier, 1993	Hell Vent, Axial Seamount, 45°55'30"N 130°2'30" W	Temperate Northern Pacific	1575 m	Hydrothermal vents
	Paralvinella unidentata	Desbruyères & Laubier, 1993	North-Fiji Basin	Central Indo-Pacific	2000 m	Hydrothermal vents
Ampharetidae	Abderos minotaurus	Schüller & Jirkov, 2013	Central Weddell Sea	Southern Ocean	3400 m
	Adercodon pleijeli	Mackie, 1994	Banyuls, Mediterranean Sea	Temperate Northern Atlantic	40-50 m
	Alkmaria romijni	Horst, 1919	not known, perhaps Naturalis, geounit Netherlands	Temperate Northern Atlantic	shallow water 0-10 m
	Amage adspersa	(Grube, 1863)	Adriatic Sea	Temperate Northern Atlantic	<70 m
	Amage anops	(Johnson, 1901)	Washington (State)	Temperate Northern Atlantic	20-170 m
	Amage arieticornuta	Moore, 1923	Pacific Ocean off San Miguel Island, California	Temperate Northern Pacific	440-1200 m	green mud
	Amage asiaticus	Uschakov, 1955	Pacific Ocean , Seas of Japan and Okohtsk	Temperate Northern Pacific	-
	Amage auricula	Malmgren, 1866	Laurentian Channel (bathyal zone)(=Honguedo Strait), North Atlantic	Temperate Northern Atlantic	100-120 m	mud
	Amage benhami	Reuscher, Fiege & Wehe, 2009	North-East Pacific: Cascadia Margin off Oregon, USA.	Temperate Northern Pacific	293-625 m	cold seeps sediments
	Amage corrugata	(Fauchald, 1972)	Mexican Exclusive Economic Zone	Tropical Easten Pacific	1600-1650 m
	Amage delus	(Chamberlin, 1919)	Baja California	Temperate Northern Pacific	900-1800 m
	Amage ehlersi	Reuscher, Fiege & Imajima, 2015	Sagami Bay	Temperate Northern Pacific	200 m
	Amage gallasii	Marion, 1875	Gulf of Marseille, Western Mediterranean Sea	Temperate Northern Atlantic	-
	Amage imajimai	Reuscher, 2015	Sagami Bay	Temperate Northern Pacific	990–1060 m
	Amage longibranchiata	Hartman, 1960	Pacific Ocean off southern California	Temperate Northern Pacific	814 m	green mud
	Amage longitorus	Reuscher, Fiege & Imajima, 2015	off Kashima-nada (36º33.5′N, 141º01.3′E)	Temperate Northern Pacific	3000 m
	Amage madurensis	(Caullery, 1944)	Indonesia	Central Indo-Pacific	69-91 m
	Amage micropaleata	Schüller & Jirkov, 2013	Weddell Sea, Southern Ocean	Southern Ocean	1582 - 4720 m
	Amage perfecta	Moore, 1923	Pacific Ocean off southern California	Temperate Northern Pacific	>1000 m
	Amage pusilla	Verrill, 1873	Atlantic Ocean off New England	Temperate Northern Atlantic	shallow water 10 m	shelly bottom
	Amage quadribranchiata	(Fauchald, 1972)	Mexican Exclusive Economic Zone	Tropical Easten Pacific	1100 m
	Amage scotica	Clark, 1952	Scotland	Temperate Northern Atlantic	shallow water 10 m
	Amage sculpta	Ehlers, 1908	Antarctic Ocean off Bouvet Island	Southern Ocean	439 m
	Amage scutata	Moore, 1923	Pacific Ocean off Monterey Bay, California	Temperate Northern Pacific	70-1185 m
	Amage septemdecima	Schüller & Jirkov, 2013	Southern Ocean	Southern Ocean	50-170 m
	Amage tasmanensis	(Holthe, 2000)	New Zealand part of the Tasman Sea	Central Indo-Pacific	3830
	Amage tumida	Ehlers, 1887	Caribbean Sea off southern Florida	Tropical Atlantic	339 m
	Ampharana antarctica	Hartman, 1967	Pacific-Antarctic Ridge	Southern Ocean	deep waters 4000-5000 m
	Ampharete acutifrons	(Grube, 1860)	northern Gaspe Waters	Temperate Northern Atlantic	shallow waters <100 m
	Ampharete agulhasensis	(Day, 1961)	South Africa	Temperate Soutern Africa	73-105 m
	Ampharete americana	Day, 1973	Atlantic Ocean off North Carolina	Temperate Northern Atlantic	10-20 m
	Ampharete ampullata	Imajima, Reuscher & Fiege, 2012	Japan	Temperate Northern Pacific	intertidal to shallow water (< 120 m)
	Ampharete arctica	Malmgren, 1866	Arctic species, occasionally found from Bay of Fundy to Cape Hatteras	Arctic	100 m
	Ampharete baltica	Eliason, 1955	Baltic Sea	Temperate Northern Atlantic	shallow waters 0-30 m
	Ampharete borealis	(M. Sars, 1856)	North Atlantic	Temperate Northern Atlantic	shallow to moderate depth
	Ampharete californica	(Hilbig, 2000)	California	Temperate Northern Pacific	70-100 m
	Ampharete capensis	(Day, 1961)	South Africa	Temperate Soutern Africa	10-20 m
	Ampharete cinnamomea	Imajima, Reuscher & Fiege, 2012	Japan	Temperate Northern Pacific	20 m
	Ampharete cornuta	(Hilbig, 2000)	Point Concepcion	Southern Ocean	300-600 m
	Ampharete crassiseta	Annenkova, 1929	Arctic Ocean	Arctic	6-21 m
	Ampharete debrouweri	Jeldes & Lefevre, 1959	Atlantic Ocean off western Africa	Temperate Soutern Africa	~50 m
	Ampharete eupalea	Chamberlin, 1920	Alaska	Arctic	~20 m	Bottom, mud with pebbles
	Ampharete falcata	Eliason, 1955	Swedish Exclusive Economic Zone	Temperate Northern Atlantic	0-400 m
	Ampharete finmarchica	(M. Sars, 1865)	Coast of Norway	Temperate Northern Atlantic	100-180 m
	Ampharete gagarae	Uschakov, 1950	Sea of Okhotsk, western Pacific Ocean	Temperate Northern Pacific	200-664 m
	Ampharete goesi	Malmgren, 1866	Spitsbergen	Arctic	35-170 m
	Ampharete homa	Chamberlin, 1919	Pacific Ocean in Gulf of California	Temperate Northern Pacific	900-1800 m
	Ampharete johanseni	Chamberlin, 1920	Alaska	Arctic	5-10 m	Bottom, mud and gravel
	Ampharete kerguelensis	McIntosh, 1885	Kerguelen Island	Southern Ocean	deep waters >1000 m
	Ampharete kudenovi	Jirkov, 1994	north-western Pacific Ocean	Temperate Northern Pacific	-
	Ampharete labrops	Hartman, 1961	Pacific Ocean off southern California	Temperate Northern Pacific	~50 m
	Ampharete lindstroemi	Malmgren, 1867 sensu Hessle, 1917	North Sea	Temperate Northern Pacific	0-200 m
	Ampharete lineata	(Berkeley & Berkeley, 1943)	Hudson Bay	Arctic	0-200 m
	Ampharete longipaleolata	Uschakov, 1950	Pacific Ocean in Sea of Okothsk	Temperate Northern Pacific	65-443 m
	Ampharete luederitzi	(Augener, 1918)	Luderitzbuch Bay	Temperate Soutern Africa	40-110 m
	Ampharete macrobranchia	Caullery, 1944	Indonesia	Central Indo-Pacific	216 m
	Ampharete manriquei	(Salazar-Vallejo, 1996)	Isla San Lorenzo	Temperate South America	0-70 m
	Ampharete minuta	Langerhans, 1881	Madeira	Temperate Northern Atlantic	18-54 m
	Ampharete octocirrata	(Sars, 1835)	Norway	Temperate Northern Atlantic	0-700 m
	Ampharete oculata	(Webster, 1879)	New Jersey	Temperate Northern Atlantic	0 - 150 m
	Ampharete oculicirrata	Parapar, Moreira & Barnich, 2019	West of the Orkney Islands, West Shetland shelf, Scotland	Temperate Northern Atlantic	130 m
	Ampharete parvidentata	Day, 1973	Atlantic Ocean at North Carolina	Temperate Northern Atlantic	35-120 m
	Ampharete petersenae	Zhirkov, 1997	Northern Atlantic	Temperate Northern Atlantic	10-70 m
	Ampharete reducta	Chamberlin, 1920	Alaska	Arctic	5 m	Bottom, mud and gravel
	Ampharete santillani	Parapar, Kongsrud, Kongshavn, Alvestad, Aneiros & Moreira, 2017	NE Atlantic	Temperate Northern Atlantic	1-106 m
	Ampharete saphronovae	Jirkov, 1994	north-western Pacific Ocean	Temperate Northern Pacific	-
	Ampharete setosa	Verrill, 1873	Atlantic Ocean, Connecticut	Temperate Northern Atlantic	0-50 m
	Ampharete sibirica	(Wirén, 1883)	East Siberian Sea	Arctic	0-50 m
	Ampharete sombreriana	McIntosh, 1885	Atlantic Ocean off West Indies	Temperate Soutern Africa	deep waters 820 m
	Ampharete trilobata	Webster & Benedict, 1887	Gulf of Maine	Temperate Northern Atlantic	shallow waters
	Ampharete undecima	Alvestad, Kongsrud & Kongshavn, 2014	Norwegian part of the Norwegian Sea	Temperate Northern Atlantic	770 m
	Ampharete vega	(Wirén, 1883)	Arctic Ocean	Arctic	20 m
	Ampharete villenai	Parapar, Helgason, Jirkov & Moreira, 2012	South Iceland slope, 62°14'41"N; 19°28'62"W	Southern Ocean	1605 - 2270 m
	Amphicteis alaskensis	Moore, 1905	Pacific Ocean, Alitak Bay, Alaska	Arctic	~75 m	green mud, with fine sand
	Amphicteis antarctica	Hessle, 1917	South Georgian part of the Southern Ocean	Southern Ocean	360 m
	Amphicteis atlantica	McIntosh, 1885	Pacific Ocean	Temperate Northern Pacific	deep waters 5030 m	red clay
	Amphicteis bifolium	Kucheruk, 1976	Alaska Bay	Arctic	deep waters
	Amphicteis chilensis	Hartmann-Schröder, 1965	Chilean part of the South Pacific Ocean	Temperate South America	shallow to moderate depth
	Amphicteis dalmatica	Hutchings & Rainer, 1979	Australia, New South Wales	Temperate Australasia	shallow waters
	Amphicteis fiegei	Reuscher, 2017	Red Sea	Temperate Northern Atlantic	12-18 m	reef
	Amphicteis glabra	Moore, 1905	Pacific Ocean, Naha Bay, Alaska	Arctic	0-100 m
	Amphicteis gunneri	(M. Sars, 1835)	Norwegian Exclusive Economic Zone	Temperate Northern Atlantic	0-300 m	bathyal, infralittoral and circalittoral of the Gulf and estuary
	Amphicteis japonica	McIntosh, 1885	Japan	Temperate Northern Pacific	deep waters 630 m	green mud
	Amphicteis malayensis	Caullery, 1944	Malay Archipelago	Central Indo-Pacific	400-500 m
	Amphicteis mederi	Annenkova, 1929	Northern Sea of Japan	Temperate Northern Pacific	shallow to moderate depth
	Amphicteis midas	(Gosse, 1855)	United Kingdom Exclusive Economic Zone	Temperate Northern Atlantic	0-110 m
	Amphicteis mucronata	Moore, 1923	Pacific Ocean, off San Diego and Monterey Bay, California	Temperate Northern Pacific	40-300 m
	Amphicteis nasuta	Ehlers, 1887	Caribbean Sea off Florida	Tropical Atlantic	~985 m
	Amphicteis ninonae	Jirkov, 1985	North Atlantic	Temperate Northern Atlantic	0-700 m
	Amphicteis obscurior	Chamberlin, 1919	Pacific Ocean off western Mexico	Tropical Easten Pacific	˜1000 m
	Amphicteis orphnius	Chamberlin, 1919	Pacific Ocean off western Mexico	Tropical Easten Pacific	˜1000 m
	Amphicteis pennata	Jeldes & Lefevre, 1959	Atlantic Ocean off western Africa	Temperate Soutern Africa	-
	Amphicteis philippinarum	Grube, 1878	Philippines	Central Indo-Pacific	0-100 m
	Amphicteis posterobranchiata	Fauvel, 1932	Indian Ocean off Sri Lanka	Western Indo-Pacific	deep waters 1200 m
	Amphicteis quadridentata	Caullery, 1944	Indonesia	Central Indo-Pacific	655-1310 m
	Amphicteis sarsi	McIntosh, 1885	Atlantic Coast of South America	Temperate South America	4846 m	blue mud
	Amphicteis scaphobranchiata	Moore, 1906	Pacific Ocean at Vancouver Island, Britsh Columbia	Temperate Northern Pacific	0-130 m
	Amphicteis sibogae	Caullery, 1944	Indonesia	Central Indo-Pacific	883-2798 m
	Amphicteis spinosa	Reuscher, Fiege & Imajima, 2015	Japan	Temperate Northern Pacific	164 m
	Amphicteis sundevalli	Malmgren, 1866	Arctic Basin	Arctic	~0-100 m
	Amphicteis taurus	Reuscher, Fiege & Imajima, 2015	Japan	Temperate Northern Pacific	5565-5692 m
	Amphicteis teresae	Schiaparelli & Jirkov, 2016	Ross Sea, Antarctica	Southern Ocean	400 m
	Amphicteis theeli	Caullery, 1944	Indonesia	Central Indo-Pacific	36 m
	Amphicteis trichophora	Hartman, 1965	Atlantic Ocean off New England	Temperate Northern Atlantic	500-2000 m
	Amphicteis uncopalea	Chamberlin, 1919	Pacific Ocean off western Mexico	Tropical Easten Pacific	900-1800 m
	Amphicteis wesenbergae	Parapar, Helgason, Jirkov & Moreira, 2011	Norwegian Sea	Temperate Northern Atlantic	200-3000 m
	Amphisamytha bioculata	(Moore, 1906)	Strait of Georgia	Temperate Northern Atlantic	57–165 m
	Amphisamytha carldarei	Stiller, Rousset, Pleijel, Chevaldonné, Vrijenhoek & Rouse, 2013	northeast Pacific Ocean, Juan de Fuca Ridge,	Temperate Northern Pacific	2187-2415 m	Hydrothermal vents
	Amphisamytha fauchaldi	Solís-Weiss & Hernández-Alcántara, 1994	Guaymas Basin, Gulf of California, Mexico	Tropical Easten Pacific	603-2860 m	Cold seeps, "hydrothermal seeps" and sedimented hydrothermal vents
	Amphisamytha galapagensis	Zottoli, 1983	Pacific Ocean at the Galapagos Ridge	Tropical Easten Pacific	2335-2725 m	Hydrothermal vents
	Amphisamytha jacksoni	Stiller, Rousset, Pleijel, Chevaldonné, Vrijenhoek & Rouse, 2013	southern East Pacific Rise	Temperate Northern Pacific	2235- 2515 m	Hydrothermal vents
	Amphisamytha japonica	Hessle, 1917	Japan	Temperate Northern Pacific	300 m
	Amphisamytha julianeae	Stiller, Rousset, Pleijel, Chevaldonné, Vrijenhoek & Rouse, 2013	West Pacific, North Fiji back-arc basin	Central Indo-Pacific	1980 m	Hydrothermal vents
	Amphisamytha lutzi	(Desbruyères & Laubier, 1996)	Azores Exclusive Economic Zone	Temperate Northern Atlantic	1622-4080 m	Hydrothermal vents
	Amphisamytha vanuatuensis	Reuscher, Fiege & Wehe, 2009	Papua New Guinea	Central Indo-Pacific	1114-2719 m	Cold seeps, hydrothermal vents
	Amythas membranifera	Benham, 1921	Antarctic Ocean	Southern Ocean	150-1500 m (holotype 594)
	Amythasides macroglossus	Eliason, 1955	Norway	Temperate Northern Atlantic	100-700 m
	Andamanella bellis	Holthe, 2002	Thailand	Central Indo-Pacific	-
	Anobothrus amourouxi	Bonifácio, Lavesque, Bachelet & Parapar, 2015	Capbreton Canyon, SE Bay of Biscay, France	Temperate Northern Atlantic	394 m
	Anobothrus antarctica	Monro, 1939	Antarctic Ocean	Southern Ocean	437 m
	Anobothrus apaleatus	Reuscher, Fiege & Wehe, 2009	North-East Pacific: Cascadia Margin (off Oregon, USA)	Temperate Northern Pacific	2206-2219 m	Cold seeps and inactive hydrothermal vent
	Anobothrus auriculatus	Alalykina & Polyakova, 2020	Okhotsk Sea	Temperate Northern Pacific	5120–9584 m	Trench and adjacent abyssal plain
	Anobothrus bimaculatus	Fauchald, 1972	Pacific Ocean off western Mexico	Tropical Easten Pacific	880–1645 m
	Anobothrus dayi	Imajima, Reuscher & Fiege, 2013	Japan	Temperate Northern Pacific	30-125 m
	Anobothrus fimbriatus	Imajima, Reuscher & Fiege, 2013	Japan	Temperate Northern Pacific	1997–3377 m
	Anobothrus flabelligerulus	Imajima, Reuscher & Fiege, 2013	Japan	Temperate Northern Pacific	17–825 m
	Anobothrus glandularis	(Hartmann-Schröder, 1965)	Chilean part of the South Pacific Ocean	Temperate South America	50–385 m
	Anobothrus gracilis	(Malmgren, 1866)	Swedish Exclusive Economic Zone	Temperate Northern Atlantic	9–1960 m
	Anobothrus jirkovi	Alalykina & Polyakova, 2020	Okhotsk Sea	Temperate Northern Pacific	3360–5780
	Anobothrus laubieri	(Desbruyères, 1978)	Norway	Temperate Northern Atlantic	155–3965 m
	Anobothrus mancus	Fauchald, 1972	Pacific Ocean off western Mexico	Tropical Easten Pacific	730–2295 m
	Anobothrus mironovi	Jirkov, 2009	southeastern pacific	Eastern Indo-Pacific	850–3890 m
	Anobothrus paleaodiscus	Schüller & Jirkov, 2013	Southern Ocean	Southern Ocean	1100 - 4720 m
	Anobothrus paleatus	Hilbig, 2000	off Point Sal, Santa Maria Basin, California	Temperate Northern Pacific	550–610 m
	Anobothrus patagonicus	(Kinberg, 1866)	Patagonia Bay	Temperate South America	10–400 m
	Anobothrus patersoni	Jirkov, 2009	Offshore east of Japan	Temperate Northern Pacific	3260–8292 m
	Anobothrus pseudoampharete	Schüller, 2008	Weddell Sea, Southern Ocean	Southern Ocean	774–4574 m
	Anobothrus rubropaleatus	Schüller & Jirkov, 2013	Southwestern Atlantic	Temperate South America	50 m
	Anobothrus sonne	Alalykina & Polyakova, 2020	Okhotsk Sea	Temperate Northern Pacific	3300–7123 m	Trench and adjacent abyssal plain
	Anobothrus wilhelmi	Schüller & Jirkov, 2013	South Africa/ South Atlantic	Temperate Soutern Africa	1100 - 4720 m
	Auchenoplax andamana	Holthe, 2002	Thailand	Central Indo-Pacific	-
	Auchenoplax crinita	Ehlers, 1887	Gulf of Mexico	Tropical Atlantic	619 m
	Auchenoplax mesos	Hutchings, 1977	Australia	Central Indo-Pacific	5m
	Auchenoplax rullieri	Holthe, 1986	New Caledonia	Central Indo-Pacific	7-8 m
	Auchenoplax worsfoldi	Jirkov & Leontovich, 2013	Aquitaine Basin, Bay of Biscay	Temperate Northern Atlantic	110 m
	Decemunciger apalea	Zottoli, 1982	NW Atlantic	Temperate Northern Atlantic	1830-3506 m	Decaying wood
	Ecamphicteis elongata	Fauchald, 1972	Pacific Ocean off western Mexico	Tropical Easten Pacific	600-700 m
	Eclysippe eliasoni	(Day, 1973)	North Carolina Shelf	Temperate Northern Atlantic	40-500 m
	Eclysippe trilobata	(Hartman, 1969)	California	Temperate Northern Pacific	616 m
	Eclysippe vanelli	(Fauvel, 1936)	Morocco	Temperate Northern Atlantic	15-313 m
	Eclysippe yonaguniensis	Reuscher & Fiege, 2016	Okinawa Trough	Temperate Northern Pacific	1324 m	seepage site
	Emaga laevis	Hartman, 1978	Weddell Sea	Southern Ocean	311-3697 m
	Endecamera palea	Zottoli, 1982	NW Atlantic	Temperate Northern Atlantic	3995 m	Decaying wood
	Eusamythella multidentata	Wu, Wu & Qian, 1987	Antarctic Ocean	Southern Ocean	-
	Eusamythella sexdentata	(Hartman, 1967)	Southern Ocean	Southern Ocean	2119-2562 m
	Glyphanostomum abyssale	Day, 1967	Southern Africa	Temperate Soutern Africa	2269 m
	Glyphanostomum bilabiatum	Reuscher & Fiege, 2016	Okinawa Trough	Temperate Northern Pacific	1365-1385 m	Sedimented hydrothermal vents
	Glyphanostomum hesslei	Reuscher, Fiege & Imajima, 2015	Japan	Temperate Northern Pacific	1015-1028 m
	Glyphanostomum holthei	Reuscher, Fiege & Wehe, 2009	NE Pacific	Temperate Northern Pacific	4743-4947 m	Cold seeps
	Glyphanostomum moreirai	Aguirrezabalaga & Parapar, 2014	Capbreton Canyon, Bay of Biscay	Temperate Northern Atlantic	508–1040 m
	Glyphanostomum pallescens	(Théel, 1879)	Nova Zembla	Temperate Northern Atlantic	298-4209 m
	Glyphanostomum scotiarum	Hartman, 1978	Antarctic Ocean, Weddell Sea	Southern Ocean	298-4209 m
	Gnathampharete paradoxa	Desbruyères, 1978	Ivory Coast	Tropical Atlantic	15-21 m
	Grassleia hydrothermalis	Solis-Weiss, 1993	Pacific Ocean at Gorda Ridge	Tropical Easten Pacific	595-3271 m	Sedimented vents and cold seeps
	Grubianella antarctica	McIntosh, 1885	Southern Ocean	Southern Ocean	3611 m	Diatom ooze
	Grubianella brevicirrata	Wu, Wu & Qian, 1987	Southern Ocean	Southern Ocean	deep sea ~400-4000 m (?)
	Grubianella cirratus	(Kucheruk, 1976)	Arctic-Boreal marine	Arctic	deep sea ~5000 m (?)
	Grubianella klugei	(Pergament & Khlebovich, 1964)	Northern Greenland Sea	Arctic	~800
	Isolda albula	Mohammad, 1971	Indian Ocean, Kuwait, Gulf of Iran	Western Indo-Pacific	intertidal to shallow water	Stratified calcareous sand stone and light to dark gray sand (with very little mud)
	Isolda armata	(Kinberg, 1867)	Ecuadorean Exclusive Economic Zone	Tropical Easten Pacific	intertidal to shallow water	–
	Isolda bipinnata	Fauchald, 1977	Caribbean Sea, Panama	Tropical Atlantic	intertidal to shallow water	Biogenic har substrate, at the Laurencia Zone – Galeta Reef
	Isolda heterobranchiata	(Wesenberg-Lund, 1949)	Persian Gulf	Temperate Northern Atlantic	7 m	–
	Isolda pulchella	Müller in Grube, 1858	Off Santa Catarina, southern Brazil (Rio Grande)	Temperate South America	shallow water	Soft and hard substrates
	Isolda viridis	Hartmann-Schröder, 1965	Pacific Ocean, Chile	Temperate South America	100 to 1000 m
	Jugamphicteis galatheae	Holthe, 2000	Kermadec Trench, offshore New Zealand within North Island	Central Indo-Pacific	-
	Jugamphicteis paleata	Fauchald & Hancock, 1981	Pacific Ocean, Oregon	Temperate Northern Pacific	-
	Jugamphicteis sargassoensis	(Hartman & Fauchald, 1971)	North Atlantic	Temperate Northern Pacific	3806-5023 m
	Lysippe annectens	Moore, 1923	Pacific Ocean, off San Diego and Channel Islands, California	Temperate Northern Pacific	70-1950 m
	Lysippe bipennata	(Augener, 1918)	West Africa	Temperate Soutern Africa	-
	Lysippe caeca	(Holthe, 2000)	Bali, Indonesia	Western Indo-Pacific	600-700 m
	Lysippe fragilis	(Wollebaek, 1912)	North Sea, Norway	Temperate Northern Atlantic	20-180 m
	Lysippe labiata	Malmgren, 1866	North Atlantic	Temperate Northern Atlantic	50-1500 m
	Lysippe mexicana	Fauchald, 1972	Pacific Ocean, western Mexico	Tropical Easten Pacific	800-2500 m
	Lysippe nikiti	Jirkov, 2016	NW Pacific	Temperate Northern Pacific	4260-6210 m
	Lysippe nipponica	Reuscher, Fiege & Imajima, 2015	Japan	Temperate Northern Pacific	50 m
	Melinantipoda antarctica	Hartman, 1967	Antarctic Ocean, Peter I Island	Southern Ocean	3000 to 5000 m
	Melinna aberrans	Fauvel, 1932	Indian Ocean, Vizagatpatam Channel, India	Western Indo-Pacific	Shallow water
	Melinna albicincta	Mackie & Pleijel, 1995	Kosterfjord, SW of Vttre Vattenholmen, Sweden	Temperate Northern Atlantic	shallow to moderate depth 40-400 m	Mixed (stones/gravel/sand), and often sandy sediments
	Melinna armandi	McIntosh, 1885	New Zealand	Central Indo-Pacific	deep waters 2000 m
	Melinna arnaudi	Parapar & San Martín, 1997	Antarctic Ocean, South Shetland Islands	Southern Ocean	deep water 330 m	Sandy mud, bottom
	Melinna buskii	McIntosh, 1922	Antarctic Ocean	Southern Ocean	deep water 3500 m	In the midst of the Diatom ooze
	Melinna collare	Detinova, 1986	Rejkjanes Ridge, North Atlantic	Temperate Northern Atlantic	deep waters 1330 to 2951
	Melinna cristata	(M. Sars, 1851)	Norwegian Exclusive Economic Zone	Temperate Northern Atlantic	78 m	Bathyal, infralittoral and circalittoral of the Gulf and estuary
	Melinna denticulata	Moore, 1908	Pacific Ocean, Funter Bay, Alaska	Arctic	deep waters 550 m	Bottom of mud
	Melinna elisabethae	McIntosh, 1914	St Andrews, Fife, Scotland	Temperate Northern Atlantic	shallow water 7-120 m	Mixed (stones/gravel/sand), and often muddy sediments
	Melinna exilia	Fauchald, 1972	Pacific Ocean, western Mexico	Tropical Easten Pacific	deep waters 1600 m
	Melinna fauchaldi	Gallardo, 1968	Pacific Ocean, VietNam	Central Indo-Pacific	shallow water (<50 m)
	Melinna heterodonta	Moore, 1923	California, North Pacific	Temperate Northern Pacific	deep waters 360-4100 m
	Melinna maculata	Webster, 1879	Atlantic Ocean, Virginia	Temperate Northern Atlantic	720-865 m
	Melinna malmgreni	Caullery, 1944	Indonesia	Central Indo-Pacific	275 m
	Melinna marchadi	Fauvel & Rullier, 1959	Plage de Goree, West Africa	Temperate Northern Atlantic	-
	Melinna monoceroides	Fauvel, 1936	Mediterranean Sea	Temperate Northern Atlantic	224 m
	Melinna ochotica	Uschakov, 1950	Pacific Ocean, Sea of Okhotsk	Temperate Northern Pacific	deep waters 5625 m
	Melinna oculata	Hartman, 1969	Pacific Ocean, southern California	Temperate Northern Pacific	shallow water <160 m
	Melinna pacifica	McIntosh, 1885	Central Pacific Ocean	Temperate Northern Pacific	deep waters 3750 m	Globigerina ooze
	Melinna palmata	Grube, 1870	English Channel	Temperate Northern Atlantic	shallow water <150 m
	Melinna parumdentata	Ehlers, 1887	Caribbean Sea off Florida	Tropical Atlantic	deep waters 580 m
	Melinna plana	Fauchald, 1972	Pacific Ocean, western Mexico	Tropical Easten Pacific	deep waters 1600 m
	Melinna profunda	Augener, 1906	Caribbean Seas	Tropical Atlantic	deep waters 2750 m
	Melinna tentaculata	Fauchald, 1972	Pacific Ocean, western Mexico	Tropical Easten Pacific	deep waters 2377-3400 m
	Melinna uruguayi	Hessle, 1917	Atlantic Ocean, Uruguay	Temperate South America	shallow water 80 m
	Melinnampharete eoa	Annenkova, 1937	Pacific Ocean, northern Sea of Japan	Temperate Northern Pacific	78-1600 m
	Melinnampharete gracilis	Hartman, 1969	Pacific Ocean, southern California	Temperate Northern Pacific	800-4416 m
	Melinnampharete septemdentata	Levenstein, 1978	Antarctic ocean	Southern Ocean	5400 m
	Melinnata americana	Hartman, 1965	Atlantic Ocean, New England	Temperate Northern Atlantic	2000-4862 m
	Melinnoides nelsoni	Benham, 1927	Antarctica, McMurdo Sound	Southern Ocean	370 m
	Melinnopsides capensis	Day, 1964	South Africa	Temperate Soutern Africa	shallow water	Sandy tubes attached to Coralline algae found near the low tide mark.
	Melinnopsis abyssalis	(Hartman, 1969)	California	Temperate Northern Pacific	deep waters 1900 m
	Melinnopsis angolensis	Hilbig, 2005	Angola Basin	Temperate Soutern Africa	deepwaters 5426 m
	Melinnopsis annenkovae	(Uschakov, 1952)	Kamchatka Shelf and Coast	Temperate Northern Pacific	4000 m
	Melinnopsis arctica	(Annenkova, 1931)	Franz Jozef Land	Central Indo-Pacific	200-1200
	Melinnopsis armipotens	(Moore, 1923)	California	Temperate Northern Pacific	4100
	Melinnopsis atlantica	McIntosh, 1885	Atlantic Ocean, off Maryland	Temperate Northern Atlantic	deep waters 3000 m	Blue mud
	Melinnopsis augeneri	Reuscher, Fiege & Imajima, 2015	Goto-Kasayama Bank, Japanese waters	Temperate Northern Pacific	185 m
	Melinnopsis chadwicki	Gunton, Kupriyanova & Alvestad, 2020	off Moreton Bay, Queensland, Australia	Central Indo-Pacific	1071-1138 m
	Melinnopsis collaris	(Hartman, 1967)	Antarctic Seas	Southern Ocean	4000-4800 m
	Melinnopsis dubita	(Hoagland, 1920)	Philippines	Central Indo-Pacific	1000 m
	Melinnopsis gardelli	Gunton, Kupriyanova & Alvestad, 2020	Jervis Commonwealth Marine Reserve, offshore New South Wales, Australia	Temperate Australasia	2636-2650 m
	Melinnopsis mcintoshi	Reuscher, Fiege & Imajima, 2015	off Otsuchi Bay, Japanese waters	Temperate Northern Pacific	1642-1659 m
	Melinnopsis monocera	(Augener, 1906)	Lesser Antilles, Caribbean Sea	Tropical Atlantic	shallow to moderate depths 200-300 m
	Melinnopsis moorei	(Hartman, 1960)	Southern California	Temperate Northern Pacific	500-4000 m
	Melinnopsis rostrata	(Wesenberg-Lund, 1950)	North-western Atlantic	Temperate Northern Pacific	3200 m
	Melinnopsis somovi	(Uschakov, 1957)	Arctic Ocean	Arctic	1239-1694 m
	Melinnopsis tentaculata	(Treadwell, 1906)	Hawaiian Exclusive Economic Zone	Eastern Indo-Pacific	500-1400 m
	Moyanus explorans	Chamberlin, 1919	Deep off Peru, 111 miles northwest of Aguja Point	Temperate South America	4064 m
	Neopaiwa cirrata	Hartman & Fauchald, 1971	Atlantic Ocean, New England	Temperate Northern Atlantic	deep waters
	Neosabellides australiensis	Hartmann-Schröder, 1981	Australia	Central Indo-Pacific	-
	Neosabellides elongatus	(Ehlers, 1913)	Ross Island	Southern Ocean	385 m
	Neosabellides litoralis	Annenkova, 1934	Arctic Ocean, Bering Island	Arctic	shallow waters
	Neosabellides lizae	Alvestad & Budaeva, 2015	Lizard Island, Great Barrier Reef, Australia	Central Indo-Pacific	intertidal
	Neosabellides oceanica	(Fauvel, 1909)	French Exclusive Economic Zone	Temperate Northern Atlantic	0-170 m
	Neosamytha gracilis	Hartman, 1967	Antarctica, Bransield Strait	Southern Ocean	220-311 m
	Noanelia hartmanae	Desbruyères & Laubier, 1977	Golfe de Gascogne, North Atlantic	Temperate Northern Atlantic	2000 m
	Noanelia orensanzi	Schüller & Jirkov, 2013	Central Weddell Sea	Southern Ocean	1100 - 4500 m
	Orochi palacephalus	Reuscher, Fiege & Imajima, 2015	Japan	Temperate Northern Pacific	209 m
	Pabits deroderus	Chamberlin, 1919	Pacific Ocean, Marquesas Islands	Eastern Indo-Pacific	4530 m
	Paedampharete acutiseries	Russell, 1987	North Atlantic Hebble area	Temperate Northern Atlantic	4000-5000 m
	Paiwa abyssi	Chamberlin, 1919	Pacific Ocean, Peru	Temperate South America	4112 m
	Parampharete weddellia	Hartman, 1978	Antarctic Ocean, Weddell Sea	Southern Ocean	2553-2575 m
	Paramphicteis angustifolia	(Grube, 1878)	Philippines	Central Indo-Pacific	shallow water
	Paramphicteis papillosa	(Hutchings, 1977)	Moreton Bay, Queensland, Australia	Central Indo-Pacific	5-8 m
	Paramphicteis sinensis	(Sui & Li, 2014)	Yellow Sea	Temperate Northern Pacific	-
	Paramphicteis weberi	(Caullery, 1944)	Indonesia	Central Indo-Pacific	45 m
	Paramytha ossicola	Queirós, Ravara, Eilertsen, Kongsrud & Hilário, 2017	Setúbal Canyon, off Portugal, northeastern Atlantic	Temperate Northern Atlantic	~1000 m	Decaying bones
	Paramytha schanderi	Kongsrud, Eilertsen, Alvestad, Kongshavn & Rapp, 2017	Loki Castle vent field, Norwegian Sea, Arctic Ocean	Temperate Northern Atlantic	~2350	Sedimented hydrothermal vents
	Pavelius makranensis	Reuscher & Fiege, 2016	Pakistani Exclusive Economic Zone	Western Indo-Pacific	1015-1038 m	Cold seeps
	Pavelius smileyi	Kongsrud, Eilertsen, Alvestad, Kongshavn & Rapp, 2017	Arctic Loki Castle vent field	Arctic	~2350 m	Sedimented hydrothermal vents
	Pavelius uschakovi	Kuznetsov & Levenstein, 1988	Okhotsk Sea	Temperate Northern Pacific	765-810 m	Cold seeps
	Phyllampharete longicirra	Hartman & Fauchald, 1971	Atlantic Ocean, New England	Temperate Northern Atlantic	5018-5023 m
	Phyllamphicteis collaribranchis	Augener, 1918	Atlantic Ocean, western Africa	Temperate Soutern Africa	-
	Phyllamphicteis foliata	(Haswell, 1883)	Queensland, Australia	Central Indo-Pacific	shallow waters
	Phyllocomus balinensis	Holthe, 2000	West Pacific, Indonesia, Bali Sea	Central Indo-Pacific	500-600 m
	Phyllocomus chinensis	Sui & Li, 2017	Yellow Sea, Station A3 (36°59'28"N, 123°58'17"E)	Temperate Northern Pacific	77 m
	Phyllocomus crocea	Grube, 1877	Kerguelen Islands	Southern Ocean	138-640 m
	Phyllocomus fauveli	(Hartman, 1955)	North Pacific Ocean, Madras	Temperate Northern Pacific	-
	Phyllocomus hiltoni	(Chamberlin, 1919)	Laguna Beach, California	Temperate Northern Pacific	0-18 m
	Phyllocomus sovjeticus	(Annenkova, 1937)	Japanese Sea	Temperate Northern Pacific	-
	Samytha annenkovae	Reuscher, Fiege & Imajima, 2015	Japan	Temperate Northern Pacific	20-1000 m
	Samytha californiensis	Hartman, 1969	Pacific Ocean, southern California	Temperate Northern Pacific	50-500 m
	Samytha gurjanovae	Uschakov, 1950	Pacific Ocean, Sea of Okhotsk	Temperate Northern Pacific	67-1366 m
	Samytha hesslei	Caullery, 1944	Indonesia	Central Indo-Pacific	27 m
	Samytha heterobranchia	Caullery, 1944	Indonesia	Central Indo-Pacific	462-1788 m
	Samytha oculata	Grube, 1878	Pacific Ocean, Northern Sea of Japan	Temperate Northern Pacific	-
	Samytha sexcirrata	(M. Sars, 1856)	Norwegian Exclusive Economic Zone	Temperate Northern Atlantic	5000 m
	Samytha speculatrix	Ehlers, 1913	Antarctic Ocean, Ross Sea	Southern Ocean	350 m
	Samytha storchi	Reuscher & Wehe in Wehe, 2009	Gulf of Aqaba	Temperate Northern Atlantic	5-15 m	Coral rubble
	Samythella affinis	Day, 1963	South Africa	Temperate Soutern Africa	183 m
	Samythella bathycola	Uschakov, 1950	Pacific Ocean, Sea of Okhotsk	Temperate Northern Pacific	-
	Samythella elongata	Verrill, 1873	Atlantic Ocean, New England	Temperate Northern Atlantic	-
	Samythella interrupta	Fauchald, 1972	Pacific Ocean, western Mexico	Tropical Easten Pacific	1100 m
	Samythella neglecta	Wollebaek, 1912	North Atlantic	Temperate Northern Atlantic	100-960 m
	Samythella pacifica	McIntosh, 1885	Japanese Exclusive Economic Zone	Temperate Northern Pacific	deep waters 4200 m	Red clay
	Samythella pala	Fauchald, 1972	Pacific Ocean, western Mexico	Tropical Easten Pacific	894 m
	Samythopsis grubei	McIntosh, 1885	Pacific Ocean, Chile	Temperate Northern Pacific	4100 m
	Sosane bathyalis	(Holthe, 1986)	Norwegian Exclusive Economic Zone	Temperate Northern Atlantic	deep waters
	Sosane brevibranchiata	Imajima, Reuscher & Fiege, 2013	Japan	Temperate Northern Pacific	100 m
	Sosane cinctus	(Hartman, 1965)	Atlantic Ocean	Atlantic Ocean	1000-1700 m
	Sosane fauveli	Caullery, 1944	Indonesia	Central Indo-Pacific	1570 m
	Sosane hesslei	(Banse, 1979)	North Atlantic	Temperate Northern Pacific	44 m
	Sosane holthei	Jirkov, 1994	Pacific Ocean	Temperate Northern Pacific	-
	Sosane jirkovi	Holthe, 2002	Thailand	Central Indo-Pacific	-
	Sosane kerguelensis	(Monro, 1939)	Kerguelen Islands	Southern Ocean	20-659 m
	Sosane occidentalis	(Hartman, 1969)	California	Temperate Northern Pacific	123 m
	Sosane procera	(Ehlers, 1887)	Gulf of Mexico	Tropical Atlantic	330-2794 m
	Sosane sulcata	Malmgren, 1866	Norwegian Exclusive Economic Zone	Temperate Northern Atlantic	12-500 m
	Sosane trigintaduo	Imajima, Reuscher & Fiege, 2013	Japan	Temperate Northern Pacific	˜100 m
	Sosane uebelackerae	Imajima, Reuscher & Fiege, 2013	Japan	Temperate Northern Pacific	44-490 m
	Sosane wahrbergi	(Eliason, 1955)	Skagerrak, North Sea	Temperate Northern Atlantic	20-80 m
	Sosane wireni	(Hessle, 1917)	North Sea	Temperate Northern Atlantic	50-440 m
	Tanseimaruana boninensis	Imajima, Reuscher & Fiege, 2013	Japan	Temperate Northern Pacific	2840–2855 m
	Tanseimaruana vestis	(Hartman, 1965)	NW Atlantic	Temperate Northern Atlantic	196-2886 m
	Watatsumi grubei	Reuscher, Fiege & Imajima, 2015	Japan	Temperate Northern Pacific	~400 m
	Weddellia profunda	Hartman, 1967	Antarcitic Ocean, South Sandwich Basin	Southern Ocean	2553-2575 m
	Ymerana pteropoda	Holthe, 1986	Norwegian Sea	Temperate Northern Atlantic	3270 m
	Zatsepinia antarctica	Schüller & Jirkov, 2013	Southern Ocean	Southern Ocean	4400 m
Pectinaridae	Amphictene alata	Zhang, Zhang & Qiu, 2015	Daya Bay and Honghai Bay, Guangdong Province, China, 22.5233 115.0917	Central Indo-Pacific	Shallow waters (6-22.5 m)	In silt-clay bottoms
	Amphictene auricoma	(O.F. Müller, 1776)	Dannish exclusive zone	Temperate Northern Atlantic		In sand with minute shells
	Amphictene capensis	(Pallas, 1766)	South Africa	Temperate Southern Africa
	Amphictene catharinensis	(Grube, 1870)	Off Santa Catarina, southern Brazil	Temperate South America
	Amphictene cercusa	Zhang & Hutchings, 2019	Pallarenda Beach, Townsville, Queensland, Australia, 19°12’S, 146°46’E	Central Indo-Pacific	intertidal
	Amphictene crassa	(Grube, 1870)	Off New Caledonia	Central Indo-Pacific
	Amphictene favona	Hutchings & Peart, 2002	Western Australia (can you add more, Pat? I don’t have the paper at home)	Central Indo-Pacific	45-47 m	Amongst bleached algal nodules
	Amphictene guatemalensis	(Nilsson, 1928)	Puerto San José, Guatemala	Tropical Eastern Pacific
	Amphictene helenae	García-Garza & de Leon-Gonzalez, 2014	Bahamintas Beach, Ciudad del Carmen, Campeche, México, 18 42' 00" N 91 41' 00" W	Tropical Atlantic	Shallow waters (1-10 m)	In coarse sand with shells fragments
	Amphictene japonica	(Nilsson, 1928)	Japanese Economic Exclusive Zone	Temperate Northern Pacific
	Amphictene leioscapha	(Caullery, 1944)	Banda Island	Central Indo-Pacific
	Amphictene lizardensis	Wong & Hutchings, 2015	Lizard Island, Queensland, Australia	Central Indo-Pacific	Shallow waters (6.5 m)	In sand
	Amphictene moorei	(Annenkova, 1929)	Arctic Ocean	Arctic
	Amphictene souriei	(Fauvel, 1949)	Dakar, Senegal	Tropical Atlantic	Intertidal to shallow waters
	Amphictene undulata	Zhang & Hutchings, 2019	Offshore, north of Ningaloo, Western Australia, 21°58'08 S 113°45’14 E	Central Indo-Pacific	726-732 m
	Amphictene uniloba	Hutchings & Peart, 2002	New South Wales, Australia (can you add more, Pat? I don’t have the paper at home)	Temperate Australasia	intertidal to ~100m
	Cistenides brevicoma	(Johnson, 1901)	Alaska, USA	Temperate Northern Pacific	Shallow waters ~20 m
	Cistenides ehlersi	(Hessle, 1917)	Patagonia	Temperate South America
	Cistenides granulata	(Linnaeus, 1767)	West Europe	Temperate Northern Atlantic
	Cistenides hyperborea	Malmgren, 1866	Greenland	Arctic	~30-150 m	In argilous sand
	Cistenides soldatovi	(Annenkova, 1929)	Northern Sea of Japan	Temperate Northern Pacific
	Lagis abranchiata	(Fauvel, 1932)	India	Western Indo-Pacific
	Lagis australis	(Ehlers, 1904)	Lyttelton, New Zealand	Temperate Australasia
	Lagis bocki	(Hessle, 1917)	Japanese Economic Exclusive Zone	Temperate Northern Pacific	Shallow waters (14 m)
	Lagis crenulatus	Sun & Qiu, 2012	Mai Po Inner Deep Bay (Shenzhen), Ramsar Site of Hong Kong, China, 22°30'N 114°02'E	Central Indo-Pacific	Intertidal	In mudflat
	Lagis hupferi	(Nilsson, 1928)	Southwestern Africa	Temperate Southern Africa
	Lagis koreni	Malmgren, 1866	Norwegian Economic Exclusive Zone	Temperate Northern Atlantic	~50-100 m
	Lagis neapolitana	(Claparède, 1869)	Gulf of Naples, Italy	Temperate Northern Atlantic
	Lagis plurihamus	Choi, Jung & Yoon, 2017	Haeun-ri, Hyeongyeong-myeon, Muan-gun, Jeollanam-do, Korea, 35.0592° 126.4278°	Temperate Northern Pacific	intertidal
	Lagis portus	Zhang & Hutchings, 2019	Smiths Creek, Hawkesbury River, Sydney, New South Wales, Australia, 33°39’S 151°13’E	Temperate Australasia	Low tide mark	in seagrass
	Lagis pseudokoreni	(Day, 1955)	South Africa	Temperate Southern Africa
	Lagis tenera	Hartmann-Schröder, 1959	El Salvador	Tropical Eastern Pacific
	Pectinaria aegyptia	(Savigny, 1822)	Gulf of Suez, Egypt Red Sea	Western Indo-Pacific
	Pectinaria antipoda	Schmarda, 1861	Port Jackson, Sydney Harbour, Australia, 33°51'S 151°16'E	Temperate Australasia	Shallow water	In subtidal sands
	Pectinaria belgica	(Pallas, 1766)	Scheveningen, Netherlands	Temperate Northern Atlantic
	Pectinaria bifurcata	Blainville, 1828	France (Atlantic or Mediterranean?)	Temperate Northern Atlantic
	Pectinaria brevispinis	Grube, 1878	Philipines	Central Indo-Pacific
	Pectinaria californiensis	Hartman, 1941	Redondo Beach, southern California	Temperate Northern Pacific	~15-400 m
	Pectinaria capensis	(Pallas, 1766)	South Africa	Temperate Southern Africa
	Pectinaria carnosa	Wong & Hutchings, 2015	Lizard Island, Queensland, Australia	Central Indo-Pacific	Intertidal	Amongst coral rubble
	Pectinaria chilensis	Nilsson, 1928	Chile	Temperate South America
	Pectinaria clava	Grube, 1878	Philipines	Central Indo-Pacific
	Pectinaria conchilega	Grube, 1878	Philipines	Central Indo-Pacific
	Pectinaria dimai	Zachs, 1933	Northern Sea of Japan	Temperate Northern Pacific
	Pectinaria dodeka	Hutchings & Peart, 2002	Queensland, Australia	Central Indo-Pacific	From shallow waters to 82m	In soft bottoms, frequently associated with seagrass beds
	Pectinaria gouldii	(Verrill, 1873)	New England, USA	Temperate Northern Atlantic	Shallow waters (~20 m)	Amongst stones with mud
	Pectinaria hartmanae	(Reish, 1968)	Los Angeles Bay, USA	Temperate Northern Pacific		in silty sand
	Pectinaria hiuchiensis	Kitamori, 1965	Japanese Economic Exclusive Zone	Temperate Northern Pacific
	Pectinaria incerta	(Chenu, 1842)	?	?
	Pectinaria kanabinos	Hutchings & Peart, 2002	Queensland, Australia	Central Indo-Pacific	Shallow water	Sheltered bays or rivers, with muddy sediments, in shallow depths.
	Pectinaria nana	Wesenberg-Lund, 1949	Gulf of Oman	Western Indo-Pacific
	Pectinaria ningalooensis	Zhang & Hutchings, 2019	North off Ningaloo, Western Australia, 22°00'14” S 113°40’44”E	Central Indo-Pacific	658-754 m
	Pectinaria nonatoi	Nogueira, Ribeiro, Carrerette & Hutchings, 2019	Canal de São Sebastião, São Paulo, Brazil, 23°45'31"S 45°23'57"W	Temperate South America	Intertidal to shallow waters (~20 m)	In muddy sand and sandy bottoms
	Pectinaria okudai	(Imajima & Hartman, 1964)	Japanese Economic Exclusive Zone	Temperate Northern Pacific
	Pectinaria panava	Willey, 1905	Sri Lankan Economic Exclusive Zone	Western Indo-Pacific
	Pectinaria papillosa	Caullery, 1944	Indonesia	Central Indo-Pacific
	Pectinaria parvibranchis	Grube, 1878	Philipines	Central Indo-Pacific
	Pectinaria profunda	Caullery, 1944	Indonesia	Central Indo-Pacific
	Pectinaria regalis	Verrill, 1901	Bermuda	Tropical Atlantic	Intertidal	In sand with shells
	Pectinaria torquata	Zhang & Qiu, 2017	Daya Bay, near Hong Kong, Guangdong Province, 22°45.17'N 114°42.98'E	Central Indo-Pacific	Shallow waters (9 m)	In muddy sand
	Petta alissoni	Nogueira, Ribeiro, Carrerette & Hutchings, 2019	offshore of São Paulo, Brazil 24°21'S 44°10'W	Temperate South America	100-258 m
	Petta assimilis	McIntosh, 1885	West of Crozet Islands	Southern Ocean	~3000 m	In diatoms ooze
	Petta investigatoris	Zhang, Hutchings & Kupriyanova, 2019	Offshore New South Wales, Jervis Commonwealth Marine Reserve (CMR), Australia, 35º19.98´S 151º15.48´E	Temperate Australasia	~2650 m
	Petta pellucida	(Ehlers, 1887)	Gulf of Mexico or Caribbean	Tropical Atlantic	~500 m
	Petta pusilla	Malmgren, 1866	Bohuslän, Gullmarsfjord, Sweden, 58º16.002´N 11º28.002´E	Temperate Northern Atlantic
	Petta tenuis	Caullery, 1944	Sulu, Philippines, 6º07.998´N 121º19.002´E	Central Indo-Pacific	275 m
	Petta williamsonae	Zhang, Hutchings & Kupriyanova, 2019	Bass Strait, Australia, 39º27.72´S 149º16.56´E	Temperate Australasia	2692-2760 m
Polycirridae	Amaeana accraensis	(Augener, 1918)	Ghana	Tropical Atlantic
	Amaeana angulus	Nogueira, Carrerette & Hutchings, 2015	Townsend Point, Corner Inlet, Victoria, Australia	Temperate Australasia	Low water mark to shallow water (~0.5 m)	in Zostera sp.
	Amaeana antipoda	(Augener, 1926)	New Zeland	Temperate Australasia	Shallow subtidal
	Amaeana apheles	(Hutchings, 1974)	Australia, New South Wales	Temperate Australasia	40-80 m	Seagrass beds in shallow waters
	Amaeana brasiliensis	Nogueira, Carrerette & Hutchings, 2015	Off Rio de Janeiro, Campos Basin, eastern Brazil	Tropical Atlantic	44-~70 m
	Amaeana breviachaeta	Nogueira, Carrerette & Hutchings, 2015	Lizard Island, Queensland, Australia	Central Indo-Pacific	9 m	In reefs
	Amaeana crassispinulata	Nogueira, Carrerette & Hutchings, 2015	Lizard Island, Queensland, Australia	Central Indo-Pacific	Shallow waters (18 m)	In reefs
	Amaeana dampierensis	Nogueira, Carrerette & Hutchings, 2015	King Point, East Lewis Island, Western Australia	Central Indo-Pacific	Shallow waters (13 m)	AM W.47405
	Amaeana ellobophora	Nogueira, Carrerette & Hutchings, 2015	Southwest of Tangalooma Point, Moreton Island, Moreton Bay, Queensland, Australia	Central Indo-Pacific	Shallow waters (4-6 m)	AM W.201648
	Amaeana gremarei	Lavesque, Hutchings, Daffe & Londoño-Mesa, 2020	France, Gulf of Lion, Mediterranean Sea, France	Temperate Northern Atlantic	30-100 m	In heterogeneous sands
	Amaeana hsiehae	Nogueira, Carrerette & Hutchings, 2015	Wuijang Estuary, Kinmen Island (aka Quemoy & Jinmen), Taiwan	Central Indo-Pacific	intertidal	In muddy substrate (> 60 %) plus debris of oyster shells, enriched with organic matter
	Amaeana occidentalis	(Hartman, 1944)	California, Tomales Bay	Temperate Northern Pacific	58 m (holotype)	In mud flat, soft black mud mixed with shell fragments,
	Amaeana trilobata	(Sars, 1863)	Slaatholmen i Lofoten, Lofoten Islands, northern Norway	Temperate Northern Atlantic	~90 m
	Amaeana yirrarn	Hutchings, 1997	West Bay, Port Essington, Northern Territory, Australia	Central Indo-Pacific	Low water mark	AM W.21888
	Biremis blandi	Polloni, Rowe & Teal, 1973	Tongue of the Ocean, near New Providence, Bahamas	Tropical Atlantic	597 m	Holotype from sloping walls of the Tongue of the Ocean
	Enoplobranchus sanguineus	(Verrill, 1873)	Vineyard Sound	Temperate Northern Atlantic	Low water mark	In mud, under rocks
	Hauchiella renilla	Hutchings & Glasby, 1986	Cemetery Point, Wreck Bay, Jervis Bay Territory, New South Wales, Australia	Central Indo-Pacific	Shallow waters (15 m)	In coralline algae and dead corals
	Hauchiella tentaculata	Nogueira, Hutchings & Carrerette, 2015	Lizard Island, Queensland, Australia	Central Indo-Pacific	Shallow waters (2-3 m)	In reefs
	Hauchiella tribullata	(McIntosh, 1869)	Great Britain	Temperate Northern Atlantic	20-380 m; holotype ~165 m
	Lysilla alba	Webster, 1879	Virginia	Temperate Northern Atlantic	Low water mark	In soft black mud
	Lysilla albomaculata	Caullery, 1944	Malay Archipelago	Central Indo-Pacific
	Lysilla bilobata	Hutchings & Glasby, 1986	Woolooware Bay, Georges River, New South Wales, Australia	Temperate Australasia	Shallow waters to ~80 m	In river mouths and protected bays, in mud or coarse sand, common in Posidonea and Zostera beds
	Lysilla caribe	Londoño-Mesa, 2009	Punta Gavilan, Quintana Roo, Mexico, Caribbean Sea	Tropical Atlantic		check Londoño-Mesa, 2009
	Lysilla jennacubinae	Hutchings & Glasby, 1986	Caloundra, Queensland, Australia	Central Indo-Pacific	intertidal	In rock pools on platforms of exposed rocky headlands
	Lysilla laciniata	Hutchings & Glasby, 1986	Coffin Bay, South Australia, Australia	Temperate Australasia	Low tide mark	In amongst the roots of the seagrass Zostera, at low tide levels
	Lysilla laeviseta	Hartmann-Schröder, 1965	Galera, Chile, Southeast Pacific Ocean	Temperate South America	240-260 m	In silt with fine sand and few detritus
	Lysilla longilinea	Nogueira, Hutchings & Carrerette, 2015	Lizard Island, Queensland, Australia	Central Indo-Pacific	20m	dead corals
	Lysilla loveni	Malmgren, 1866	Bohuslän, Sweden, Skagerrak	Temperate Northern Atlantic
	Lysilla lyrochaeta	Gravier, 1911	Port Charcot, Antarctic	Southern Ocean
	Lysilla macintoshi	Gravier, 1907	Port Charcot, Antarctic	Southern Ocean
	Lysilla nivea	Langerhans, 1884	Madeira	Temperate Northern Atlantic
	Lysilla pacifica	Hessle, 1917	Misaki, Miura Peninsula, Sagami Bay, Japan	Temperate Northern Pacific	Intertidal to subtidal depths	In Lizard Island (not the type locality), in fine sticky sediment and sand with filamentous algae
	Lysilla pambanensis	Fauvel, 1928	Pamban Island, Ramanathapuram (= ancient 'Ramnad') District, India, Gulf of Mannar	Western Indo-Pacific
	Polycirrus abrolhensis	Garraffoni & Costa, 2003	Abrolhos Archipelago, Bahia State, Brazil	Tropical Atlantic	Shallow waters (10 m)	In calcareous algae
	Polycirrus angeli	Londoño-Mesa, 2009	Hornos, Veracruz, Mexico, Gulf of Mexico	Tropical Atlantic		check Londoño-Mesa, 2009
	Polycirrus antarcticus	(Willey, 1902)	Antarctica, Adare, Cape	Southern Ocean
	Polycirrus aquila	Caullery, 1944	Malay Archipelago, Banda Sea	Central Indo-Pacific	Shallow waters (9-36 m)
	Polycirrus arcticus	Sars, 1865	Barents Sea, Spitsbergen	Arctic	73-183 m
	Polycirrus arenivorus	(Caullery, 1915)	France, Anse	Temperate Northern Atlantic	Intertidal	In sand
	Polycirrus asturiensis	Cepeda & Lattig, 2016	Off Las Llanas beach (Muros de Nalon, Asturias, Spain), Cantabrian Sea, Bay of Biscay	Temperate Northern Atlantic	Shallow waters (4-6 m)
	Polycirrus aurantiacus	Grube, 1860	Adriatic Sea	Temperate Northern Atlantic
	Polycirrus bicrinalis	Hutchings & Glasby, 1986	Lizard Island, Great Barrier Reef, Queensland, Australia	Central Indo-Pacific	7-80 m	In corals and muddy sediments
	Polycirrus boholensis	Grube, 1878	Philippines	Central Indo-Pacific	Shallow waters (3-12 m)
	Polycirrus breviuncinatus	Carrerette & Nogueira, 2013	Off Rio de Janeiro, Campos Basin, eastern Brazil	Tropical Atlantic	55-720 m
	Polycirrus broomensis	Hartmann-Schröder, 1979	Australia	Central Indo-Pacific	Intertidal	In sand flats in front of town, with ripple marks and plant debris from nearby Avicennia mangroves
	Polycirrus brutus	Nogueira, Hutchings & Carrerette, 2015	Lizard Island, Queensland, Australia	Central Indo-Pacific	Shallow waters (10 m)	coral rubble
	Polycirrus caliendrum	Claparède, 1869	Gulf of Naples (Italy)	Temperate Northern Atlantic
	Polycirrus californicus	Moore, 1909	California	Temperate Northern Pacific
	Polycirrus carolinensis	Day, 1973	Carolina	Temperate Northern Atlantic	Shallow waters (20 m)	In corals and sand
	Polycirrus catalanensis	Lavesque, Hutchings, Daffe & Londoño-Mesa, 2020	Banyuls-Cerbere natural reserve, Catalan Sea, Mediterranean Sea, France	Temperate Northern Atlantic	Shallow waters (30 m)	In heterogenous sands
	Polycirrus changbunker	Nogueira, van Deursen, Ranauro & Carrerette, 2020	Pontal do Sul, Paranaguá Bay, state of Paraná, southern Brazil	Temperate South America	Intertidal to shallow waters (~10 m)	In rocky shores, associated with algae, sponges, ascidians and similar substrates
	Polycirrus chilensis	Schmarda, 1861	Chile	Temperate South America
	Polycirrus clavatus	(Kinberg, 1866)	Off Alagoas, northeastern Brazil	Tropical Atlantic	Shallow waters (33 m)
	Polycirrus coccineus	(Grube, 1869)	Red Sea	Western Indo-Pacific
	Polycirrus coibensis	Glasby & Hutchings, 2014	Pacific coast of Panama	Tropical Eastern Pacific	Shallow waters (2.3 m)	In dead corals
	Polycirrus corallicola	Verrill, 1900	Bermuda	Tropical Atlantic	1 m
	Polycirrus cruciformis	Nogueira, Hutchings & Carrerette, 2015	Australia, Queensland, Great Barrier Reef, Lizard Island, MacGillivray Reef	Central Indo-Pacific	Shallow waters (4-12 m)	In reefs, amongst beds of Halimeda
	Polycirrus culcita	Nogueira, Hutchings & Carrerette, 2015	Australia, Queensland, Great Barrier Reef, Lizard Island, Watsons Bay, 100 m off Chinamans Ridge	Central Indo-Pacific	Shallow waters (9 m)	In reefs, soft sediments with patchy seagrasses
	Polycirrus decipiens	(Gravier, 1905)	Djiboutian part of the Red Sea	Western Indo-Pacific	Low water mark to ~20 m	In muddy sands
	Polycirrus denticulatus	Saint-Joseph, 1894	Dinard, Brittany, France	Temperate Northern Atlantic
	Polycirrus disjunctus	Hutchings & Glasby, 1986	Australia, New South Wales, Solitary Island	Temperate Australasia	Intertidal to ~15 m	In rocky substrates, associated with ascidians or algal mats
	Polycirrus dodeka	Hutchings, 1990	Hong Kong	Central Indo-Pacific	Shallow waters (2-10 m)	Under boulders
	Polycirrus dubius	Day, 1973	North Carolina, USA	Temperate Northern Atlantic	Shallow waters (18 m)	In corals
	Polycirrus elisabethae	McIntosh, 1915	Scotland	Temperate Northern Atlantic	Most likely shallow waters	In debris of fishing boats
	Polycirrus eous	Annenkova-Chlopina, 1924	Kulku Bay, Russia, Okhotsk Sea, Pacific Ocean	Temperate Northern Pacific
	Polycirrus fedorovi	Jirkov & Leontovich in Jirkov, 2001	Arctic Ocean	Arctic
	Polycirrus glasbyi	Lavesque, Hutchings, Daffe & Londoño-Mesa, 2020	Arcachon Bay, Bay of Biscay, NE Atlantic Ocean, France	Temperate Northern Atlantic	Shallow waters (5-9 m)	In muddy sands
	Polycirrus glaucus	Hutchings, 1993	Australia, Rottnest Island, Western Australia	Temperate Australasia	Shallow waters (30 m)	reef?, AM W 20937
	Polycirrus glossochelius	Nogueira, Hutchings & Carrerette, 2015	Australia, Queensland, Great Barrier Reef, Lizard Island Group, between South and Palfrey Islands	Central Indo-Pacific	Shallow waters (20 m)	In reefs, under rocks
	Polycirrus gujanensis	Lavesque, Hutchings, Daffe & Londoño-Mesa, 2020	Arcachon Bay, Bay of Biscay, NE Atlantic Ocean, France	Temperate Northern Atlantic	Intertidal	In medium sands
	Polycirrus haematodes	(Claparède, 1864)	Port Vendres, French/Spanish border, Mediterranean	Temperate Northern Atlantic
	Polycirrus hamiltoni	Benham, 1921	Antarctic Ocean, Macquarie Island	Southern Ocean	Intertidal	In dark sand-grains tubes attached to rocks, at lower tide mark
	Polycirrus hesslei	Monro, 1930	Antarctic Ocean	Southern Ocean	121-130 m	In fine dark sand
	Polycirrus holthei	Londoño-Mesa & Carrera-Parra, 2005	Caribbean Sea	Tropical Atlantic	Shallow waters (2 m)	In coralline rocks
	Polycirrus idex	Lavesque, Hutchings, Daffe & Londoño-Mesa, 2020	France, Corsica Cape, Mediterranean Sea	Temperate Northern Atlantic	Shallow waters (18 m)	Among rocks
	Polycirrus jubatus	Bobretzky, 1868	Sebastopol Bay, Crimea, Black Sea	Temperate Northern Atlantic
	Polycirrus kerguelensis	(McIntosh, 1885)	Kerguelen Islands	Southern Ocean	201 m
	Polycirrus latidens	Eliason, 1962	Skagerrak, Atlantic Ocean	Temperate Northern Atlantic	531 m
	Polycirrus luminosus	Verrill, 1900	Bailey Bay, Bermuda, Atlantic Ocean	Tropical Atlantic	Shallow waters (9-12 m)	In dead corals
	Polycirrus macintoshi	Glasby & Hutchings, 2014	Kerguelen	Southern Ocean	232 m	In volcanic mud
	Polycirrus medius	Hessle, 1917	Sagami Misaki Ebbestrand, Japan	Temperate Northern Pacific
	Polycirrus medusa	Grube, 1850	Anse du Rouet, west of Marseille, France	Temperate Northern Atlantic	Shallow waters (1.8 m)	In dead Posidonia beds
	Polycirrus mexicanus	(Rioja, 1947)	Western Mexico, Gulf of California	Tropical Eastern Pacific
	Polycirrus minutus	Nogueira, Hutchings & Carrerette, 2015	Australia, Queensland, Great Barrier Reef, Lizard Island, MacGillivray Reef	Central Indo-Pacific	7-22 m	In coral rubble
	Polycirrus multisetigerus	Hartmann-Schröder, 1962	Isla James, Chile	Temperate South America	Intertidal to 10 m	Holdfasts of Macroystis pyrifera
	Polycirrus multus	Hutchings, 1990	Hong Kong	Central Indo-Pacific	Shallow waters (2-10 m)	Among crevice fauna amongst live corals, in shallow waters
	Polycirrus nephrosus	Hutchings & Glasby, 1986	Ship Rock, Port Hacking, New South Wales, Australia, Pacific Ocean	Temperate Australasia	Intertidal to 10 m	AM W199641
	Polycirrus nervosus	Marenzeller, 1884	Japan	Temperate Northern Pacific
	Polycirrus nogueirai	Lavesque, Hutchings, Daffe & Londoño-Mesa, 2020	Arcachon Bay, Bay of Biscay, France	Temperate Northern Atlantic		NICO
	Polycirrus nonatoi	Carrerette & Nogueira, 2013	Off Rio de Janeiro, Campos Basin, eastern Brazil	Tropical Atlantic	33-1900 m
	Polycirrus norvegicus	Wollebaek, 1912	Drøbak, Norway	Temperate Northern Atlantic
	Polycirrus octosetus	(Hutchings, 1977)	Moreton Bay, Queensland, Australia	Central Indo-Pacific	Intertidal	In exposed beaches, estuarine
	Polycirrus oculeus	Nogueira, Hutchings & Carrerette, 2015	Australia, Queensland, Great Barrier Reef, Lizard Island, off SW Palfrey Island	Central Indo-Pacific	Intertidal to shallow water	In coral rubble
	Polycirrus paivai	Garraffoni & Costa, 2003	Abrolhos Archipel, Bahia, eastern Brazil	Tropical Atlantic	10 m	calcareous algae
	Polycirrus papillatus	Nogueira, Hutchings & Carrerette, 2015	Australia, Queensland, Great Barrier Reef, Lizard Island, off Watson's Bay	Central Indo-Pacific	Intertidal to ~10 m	Amongst Halimeda and coral rubble
	Polycirrus papillosus	Carrerette & Nogueira, 2013	Off Rio de Janeiro, Campos Basin, eastern Brazil	Tropical Atlantic	17-720 m
	Polycirrus parvus	Hutchings & Glasby, 1986	Off Port Headland, North West Shelf, Western Australia, Australia	Central Indo-Pacific	40-80 m	In sandy sediments
	Polycirrus paucidens	Hutchings & Glasby, 1986	Central Bass Strait, 60 km SW of Cape Schanck, Australia	Temperate Australasia	27-71 m	In clayey to very coarse sand, with shell fragments
	Polycirrus pellucida	(Quatrefages, 1866)	France	Temperate Northern Atlantic
	Polycirrus pennarbedae	Lavesque, Hutchings, Daffe & Londoño-Mesa, 2020	Glenan, Bay of Biscay, France	Temperate Northern Atlantic	2–7 m	Coastal maerl (rhodolith) beds
	Polycirrus pennulifera	Verrill, 1900	Bermuda	Tropical Atlantic	Shallow water
	Polycirrus perplexus	Moore, 1923	Monterey Bay, California	Temperate Northern Atlantic	~20-500 m	In sandy substrates, with rocks pebbles and mud
	Polycirrus phosphoreus	Verrill, 1880	Bay of Fundy to Cape Hatteras, including the Cobscook Bay, Canada	Temperate Northern Atlantic	Shallow waters (~30 m)
	Polycirrus plumosus	(Wollebaek, 1912)	Norway	Temperate Northern Atlantic	95 m	In sandy bottoms
	Polycirrus porcatus	Knox & Cameron, 1971	Australia, Port Phillip Bay, Victoria	Temperate Australasia	Intertidal to ~100 m	In sand and reefs
	Polycirrus pumilis	Hartmann-Schröder, 1990	South of Yamba, NSW, Australia	Temperate Australasia
	Polycirrus purpureus	Schmarda, 1861	Caribbean Sea, Jamaica, south coast	Tropical Atlantic
	Polycirrus quadratus	Hutchings, 1990	Hong Kong	Central Indo-Pacific	Shallow waters (2- 5 m)	Under boulders
	Polycirrus readi	Lavesque, Hutchings, Daffe & Londoño-Mesa, 2020	France, Corsica Cape, Mediterranean Sea	Temperate Northern Atlantic	Shallow waters to ~60 m	Among rocks and dead leaves of Posidonia
	Polycirrus rosea	Hutchings & Murray, 1984	Hawkesbury River, near Hungry Beach, New South Wales, Australia	Temperate Australasia	Shallow waters (4 m)	In sandy mud
	Polycirrus rubrointestinalis	Nogueira, Hutchings & Carrerette, 2015	Australia, Queensland, Great Barrier Reef, Lizard Island, Mermaid Cove (buoy)	Central Indo-Pacific	intertidal to ~20 m	In coral rubble
	Polycirrus swakopianus	Augener, 1918	Namibia	Temperate Southern Africa	Low water mark to ~10 m10m
	Polycirrus tentaculatus	(Hartmann-Schröder, 1960)	Peru	Temperate South America	Shallow water near low water mark	In rock pools
	Polycirrus tesselatus	Hutchings & Glasby, 1986	Western Port Bay, Victoria, Australia	Temperate Australasia	Shallow waters to ~ 130 m	In muddy to coarse sand
	Polycirrus twisti	Potts, 1928	Mediterranean Sea/Red Sea, Suez Canal	Temperate Northern Atlantic
	Polycirrus variabilis	Hutchings & Glasby, 1986	Lizard Island lagoon, Great Barrier Reef, Queensland, Australia, Pacific Ocean	Central Indo-Pacific	Shallow waters (7-12 m)	In corals
Telothelepodidae	Mesopothelepus macrothoracicus	(Mohammad, 1980)	Kuwait	Western Indo-Pacific	Near low tide mark	In muddy sand flats
	Parathelepus anomalus	(Londoño-Mesa, 2009)	Gulf of Mexico (Texas, USA)	Tropical Atlantic	58-91 m	In clayey sand
	Parathelepus collaris	(Southern, 1914)	Clew Bay (County Mayo, Ireland)	Temperate Northern Atlantic	70 m	In muddy sand
	Parathelepus macer	(Hutchings, 1977)	Moreton Bay (Queensland, Australia)	Central Indo-Pacific	Shallow waters (4-6 m)
	Parathelepus ocellatus	(Hutchings, 1977)	Moreton Bay (Queensland, Australia)	Central Indo-Pacific	Shallow waters (4 m)	In sand with mud and shells
	Parathelepus oculeus	(Hutchings, Nogueira & Carrerette, 2015)	Lizard Island (Queensland, Australia)	Central Indo-Pacific	Shallow waters (9 m)	In coral rubble
	Parathelepus praecox	Nogueira, Carrerette, Hutchings & Fitzhugh, 2018	Campos Basin, State of Rio de Janeiro, SE Brazil	Tropical Atlantic	Shallow waters (16 m)
	Parathelepus scutatum	Nogueira, Carrerette, Hutchings & Fitzhugh, 2018	Campos Basin, State of Rio de Janeiro, SE Brazil	Tropical Atlantic	Shallow waters (24 m)	In sand
	Parathelepus wambira	(Nogueira & Hutchings, 2007)	New South Wales, Australia	Temperate Australasia
	Rhinothelepus bifurcatum	Nogueira, Carrerette, Hutchings & Fitzhugh, 2018	Espírito Santo Basin, State of Espírito Santo, SE Brazil	Tropical Atlantic	34 m	In sand
	Rhinothelepus buku	Hutchings, 1997	Gove, Melville Bay, Northern Territory, Australia, Arafura Sea	Central Indo-Pacific	Shallow waters (8 m)
	Rhinothelepus lobatus	Hutchings, 1974	New South Wales, Wallis Lake, south of Godwin Island and opposite Wallis Island, Australia	Temperate Australasia	Shallow waters (>5 m)	In muddy sand clay or Zostera beds
	Rhinothelepus mexicanus	(Hutchings & Glasby, 1986)	Gulf of California	Tropical Atlantic	16-91 m	In sand and muddy substrates
	Rhinothelepus occabus	Hutchings, 1990	Hong Kong, east of Gulf Head Tolo Channel 2	Central Indo-Pacific	Shallow waters (4-9 m)	In sand or silty sand
	Telothelepus capensis	Day, 1955	Langebaan Lagoon, Cape Province, South Africa	Temperate Southern Africa	intertidal	In fine white sand
Terebellidae	Amphitrite alcicornis	Fauvel, 1909	Azores (between Pico and Sao Jorge)	Temperate Northern Atlantic
	Amphitrite attenuata	Moore, 1906	Vineyard Haven, Massachusetts	Temperate Northern Atlantic
	Amphitrite brunnea	(Stimpson, 1853)	New Brunswick (Canada)	Temperate Northern Atlantic
	Amphitrite buzhinskaje	Jirkov, 2020	Sea of Japan	Temperate Northern Pacific	Shallow waters (10 m)
	Amphitrite chloraema	(Schmarda, 1861)	Chilean part of the South Pacific Ocean	Temperate South America
	Amphitrite cirrata	Müller, 1776	United Kingdom	Temperate Northern Atlantic
	Amphitrite fauveli	Jirkov, Ravara & Cunha, 2018	Tributary of Cap Breton canyon, Bay of Biscay	Temperate Northern Atlantic	214-1317 m
	Amphitrite haematina	(Grube, 1871)	Off Santa Catarina, southern Brazil	Temperate South America
	Amphitrite jucunda	(Kinberg, 1866)	Atlantic ocean	Temperate Northern Atlantic
	Amphitrite kerguelensis	McIntosh, 1876	Kerguelen Islands	Southern Ocean
	Amphitrite leptobranchia	Caullery, 1944	Indonesia	Central Indo-Pacific								Alvinella pompejana Desbruyères & Laubier, 1980	2593
	Amphitrite lobocephala	Hsieh, 1994	Tawain	Central Indo-Pacific								Melinna ochotica Uschakov, 1950	5625
	Amphitrite luna	Dalyell, 1853	Scotland	Temperate Northern Atlantic								Petta williamsonae Zhang, Hutchings & Kupriyanova, 2019	2760
	Amphitrite malayensis	Caullery, 1944	Indonesia	Central Indo-Pacific								Biremis blandi Polloni, Rowe & Teal, 1973	597
	Amphitrite marchilensis	Hartmann-Schröder, 1965	Puerto Aguirre, Chile	Temperate South America								Rhinothelepus mexicanus (Hutchings & Glasby, 1986)	91
	Amphitrite oculata	Hessle, 1917	Japan	Temperate Northern Pacific								Pista torquata Hutchings, 2007	4540
	Amphitrite ornata	(Leidy, 1855)	Rhode Island	Temperate Northern Atlantic								Thelepus abranchiatus (Hartman & Fauchald, 1971)	2022
	Amphitrite ramosa	Risso, 1826	Mediterranean Sea, Nice, France	Temperate Northern Atlantic								Terebellides gingko Schüller & Hutchings, 2012	5180
	Amphitrite rzhavskyi	Jirkov, 2020	Mediterranean Sea, Melilla	Temperate Northern Atlantic	Shallow subtidal
	Amphitrite scylla	(Savigny, 1822)	Red Sea	Western Indo-Pacific
	Amphitrite variabilis	(Risso, 1826)	Mediterranean Sea	Temperate Northern Atlantic
	Amphitrite ventricosa	Bosc, 1802	South Carolina	Temperate Northern Atlantic
	Amphitritides bruneocomata	(Ehlers, 1887)	Key West, Florida	Tropical Atlantic
	Amphitritides carawa	Nogueira & Hutchings, 2007	Australia: New South Wales (Tasman Sea)	Temperate Australasia	Intertidal
	Amphitritides gracilis	(Grube, 1860)	Mediterranean Sea	Temperate Northern Atlantic
	Amphitritides harpa	Hutchings & Glasby, 1988	Australia, Great Barrier Reef	Central Indo-Pacific
	Amphitritides ithya	Hutchings & Glasby, 1988	Australia, Port Denison	Central Indo-Pacific	Shallow subtidal
	Amphitritides kuehlmanni	Arvanitidis & Koukouras, 1995	Euboia Gulf, Greece	Temperate Northern Atlantic	Shallow subtidal (2-5 m)
	Amphitritides pectinobranchiata	Hartmann-Schröder, 1965	Galera, Chile	Temperate South America	84-240 m	In silt with fine sand and detritus
	Arranooba booromia	Hutchings & Glasby, 1988	Rat Island, Abrolhos Group, Western Australia	Temperate Australasia
	Artacama benedeni	Kinberg, 1867	Guanabara Bay, Rio de Janeiro, southeastern Brazil	Temperate South America	Shallow waters to ~80 m
	Artacama canadensis	McIntosh, 1915	Gaspé Bay, Gulf of St. Lawrence, Canada	Temperate Northern Atlantic	55 m
	Artacama challengeriae	McIntosh, 1885	Kerguelen Islands, Antarctica	Southern Ocean
	Artacama coniferi	Moore, 1905	Pacific Ocean, Gulf of Georgia, British Columbia	Temperate Northern Pacific
	Artacama crassa	Hartman, 1967	Antarctic Ocean, Bransfield Strait	Southern Ocean
	Artacama globosa	Hartman & Fauchald, 1971	North West Atlantic	Temperate Northern Atlantic
	Artacama proboscidea	Malmgren, 1866	Arctic Ocean, Spitsbergen	Arctic
	Artacama valparaisiensis	Rozbaczylo & Méndez, 1996	Chile	Temperate South America
	Artacama zebuensis	McIntosh, 1885	Philippine Islands	Central Indo-Pacific
	Articulatia aberrans	Nogueira, Hutchings & Amaral, 2003	Off São Paulo, Brazil	Temperate South America	Shallow subtidal (0-~10 m)
	Axionice (Parascione) abyssorum	(Caullery, 1944)	Indonesia, Banda Islands	Central Indo-Pacific
	Axionice albomaculata	(Caullery, 1944)	Malay Archipelago	Central Indo-Pacific
	Axionice flexuosa	(Grube, 1860)	Greenlandic part of the Arctic Ocean	Arctic
	Axionice moorei	(Caullery, 1944)	Malay Archipelago	Central Indo-Pacific
	Betapista dekkerae	Banse, 1980	Blubber Bay, British Columbia, western Canada	Temperate Northern Pacific	Shallow waters (25-35 m)
	Colymmatops granulatus	Peters, 1854	Querimba Island, Mozambique	Western Indo-Pacific
	Eupistella darwini	(McIntosh, 1885)	Chile	Temperate South America
	Eupistella dibranchiata	(Fauvel, 1909)	Funchal, Madeira	Temperate Northern Atlantic
	Eupistella digitibranchia	(Caullery, 1944)	Indonesia	Central Indo-Pacific
	Eupistella grubei	(McIntosh, 1885)	Atlantic Ocean	Temperate Northern Atlantic
	Eupolymnia boniniana	(Hessle, 1917)	Japan, Ogasawara Islands	Temperate Northern Pacific
	Eupolymnia capensis	(McIntosh, 1924)	South Africa	Temperate Southern Africa
	Eupolymnia caulleryi	Buzhinskaja, 2013	Russia	Temperate Northern Pacific
	Eupolymnia chlorobranchiata	Nogueira, Hutchings & Carrerette, 2015	Southwest Pacific, Australia, Queensland, Great Barrier Reef, Lizard Island, mermaid Cove (buoy)	Central Indo-Pacific	Intertidal to ~10 m	In reefs
	Eupolymnia congruens	(Marenzeller, 1884)	Japan	Temperate Northern Pacific
	Eupolymnia corae	Carrerette & Nogueira, 2015	Paraíba, northeastern Brazil	Tropical Atlantic	Intertidal to 3 m	On reef of coralline algae and corals, associated with algae, sponges, ascidians and similar substrates
	Eupolymnia crassicornis	(Schmarda, 1861)	Jamaica	Tropical Atlantic
	Eupolymnia dubia	(Caullery, 1944)	Malay Archipelago	Central Indo-Pacific
	Eupolymnia heterobranchia	(Johnson, 1901)	Puget Sound	Temperate Northern Pacific
	Eupolymnia intoshi	(Caullery, 1944)	Malay Archipelago	Central Indo-Pacific
	Eupolymnia joaoi	Capa & Hutchings, 2006	Uvas Island, Coiba National Park, Panama, Pacific Ocean	Tropical Atlantic	Intertidal to ~7 m
	Eupolymnia koorangia	Hutchings & Glasby, 1988	Australia, Kangaroo Island	Temperate Australasia	intertidal to shallow waters
	Eupolymnia labiata	(Willey, 1905)	Gulf of Mannar	Western Indo-Pacific
	Eupolymnia magnifica	(Webster, 1884)	Bermuda	Tropical Atlantic
	Eupolymnia marenzelleri	(Caullery, 1944)	Malay Archipelago	Central Indo-Pacific
	Eupolymnia nebulosa	(Montagu, 1819)	Eupolymnia nebulosa	Temperate Northern Atlantic
	Eupolymnia nesidensis	(Delle Chiaje, 1828)	Gulf of Naples (Italy)	Temperate Northern Atlantic
	Eupolymnia regnans	Chamberlin, 1919	Perico Island, Panama, Pacific Ocean	Tropical Eastern Pacific
	Eupolymnia robusta	(Annenkova, 1925)	Japan	Central Indo-Pacific
	Eupolymnia rullieri	Londoño-Mesa, 2009	Majahual, Quintana Roo, Mexico, Caribbean Sea	Tropical Atlantic	Low water mark to ~ 180 m
	Eupolymnia trigonostoma	(Schmarda, 1861)	Australia, New South Wales	Temperate Australasia
	Eupolymnia triloba	(Fischli, 1900)	Philippines, Ternate	Central Indo-Pacific
	Eupolymnia umbonis	Hutchings, 1990	Hong Kong	Central Indo-Pacific	15 m
	Hadrachaeta aspeta	Hutchings, 1977	New South Wales, Australia	Temperate Australasia
	Hutchingsiella cowarrie	(Hutchings, 1997)	Western Australia (Wallabi Group, Abrolhos Islands)	Central Indo-Pacific	Shallow waters (8-39 m)
	Lanassa benthaliana	McIntosh, 1885	Central Atlantic Ocean	Temperate Northern Atlantic
	Lanassa capensis	Day, 1955	Still Bay, Western Cape Province, South Africa	Temperate Southern Africa	Intertidal
	Lanassa exelysis	Hutchings & Glasby, 1988	Australia, Victoria	Temperate Australasia
	Lanassa gracilis	(Moore, 1923)	California, Monterey Bay	Temperate Northern Pacific
	Lanassa nordenskioldi	Malmgren, 1866	Arctic Ocean, Spitsbergen	Arctic
	Lanassa ocellata	Hutchings & Glasby, 1988	Australia, New South Wales	Temperate Australasia
	Lanassa praecox	(Saint-Joseph, 1899)	France, Brittany	Temperate Northern Atlantic
	Lanassa sarsi	McIntosh, 1885	New Zeland	Temperate Australasia
	Lanassa venusta	(Malm, 1874)	Sweden	Temperate Northern Atlantic
	Lanice abyssalis	Caullery, 1944	Java	Central Indo-Pacific
	Lanice amphelisso	Hutchings, 2007	South Africa, Durban	Temperate Southern Africa	430 m
	Lanice arakani	Hissmann, 2000	Mariana Ridge, Arakane seamount	Central Indo-Pacific
	Lanice auricula	Hutchings, 1990	Hong Kong (South China Sea)	Central Indo-Pacific
	Lanice bidewa	Hutchings & Glasby, 1988	Australia, Victoria	Temperate Australasia	Shallow subtidal
	Lanice caulleryi	Holthe, 1986	East India	Western Indo-Pacific
	Lanice conchilega	(Pallas, 1766)	Netherlands	Temperate Northern Atlantic
	Lanice fauvelii	Day, 1934	South Africa	Temperate Southern Africa
	Lanice flabellum	(Baird, 1865)	Antarctica	Southern Ocean
	Lanice haitiana	Augener, 1922	Caribbean Sea, Haiti	Tropical Atlantic
	Lanice marionensis	Branch, 1998	Antarctic Ocean, Marion Island	Southern Ocean
	Lanice seticornis	(McIntosh, 1885)	Atlantic ocean	Temperate Northern Atlantic
	Lanice sinata	Hutchings & Glasby, 1990	escartes Island, Kimberley region, Western Australia	Central Indo-Pacific	Intertidal	In sandflats
	Lanice socialis	(Willey, 1905)	Sri Lanka	Western Indo-Pacific
	Lanice viridis	Nogueira, Hutchings & Carrerette, 2015	Australia, Queensland, Great Barrier Reef, off North Direction Island, near Lizard Island	Central Indo-Pacific	Intertidal to shallow waters (~3 m)	In reefs
	Lanice wollebaeki	Caullery, 1944	Tropical Indo-Pacific in Kalk, Indonesia	Western Indo-Pacific
	Lanicides attenuata	Hutchings & Glasby, 1990	Western Australia (Dampier Archipelago, Broome), Ashmore Reef	Central Indo-Pacific	Intertidal	In reefs
	Lanicides banatawa	Hutchings, 1997	Weed Reef, Darwin Harbour, Northern Territory, Australia	Central Indo-Pacific	Shallow subtidal	In reefs
	Lanicides bilobata	(Grube, 1877)	Tierra del Fuego	Temperate South America
	Lanicides fascia	Hutchings & Glasby, 1988	Western Australia (Broome)	Temperate Australasia	Intertidal to shallow subtidal
	Lanicides lacuna	Hutchings & Glasby, 1988	Australia, Queensland	Central Indo-Pacific
	Lanicides physa	Hutchings, 1993	Rottnest Island, Western Australia	Temperate Australasia
	Lanicides rubra	Nogueira, Hutchings & Carrerette, 2015	Lizard Island region of the Great Barrier Reef (Australia, Queensland)	Central Indo-Pacific	Intertidal to shallow waters (~1.5 m)	In reefs
	Lanicides taboguillae	(Chamberlin, 1919)	Panamanian part of the North Pacific Ocean	Tropical Eastern Pacific
	Lanicides tribranchiata	Hutchings & Glasby, 1988	Australia,New South Wales	Temperate Australasia	Shallow waters (3-4 m)
	Lanicides vayssierei	(Gravier, 1911)	Alexander Island, Antarctica	Southern Ocean
	Lanicola carus	(Young & Kritzler, 1987)	Belize,Twin Cays	Tropical Atlantic
	Lanicola eduardoi	Capa & Hutchings, 2006	Coiba Island, Coiba National Park, Panama	Tropical Eastern Pacific
	Lanicola garciagomezi	(Londoño-Mesa, 2006)	Florida Keys	Tropical Eastern Pacific
	Lanicola guillermoi	Capa & Hutchings, 2006	Granito de Oro Island, Coiba Natural Park, Panama	Tropical Eastern Pacific	Shallow waters (1-2.6 m)
	Lanicola hutchingsae	Carrerette & Nogueira, 2015	Brazil, State of Pernambuco, Almirante Tamandaré, Carneiros Reef	Tropical Atlantic	Intertidal to shallow waters	In reefs
	Lanicola lobata	Hartmann-Schröder, 1986	South Australia	Temperate Australasia	Intertidal to shallow waters
	Lanicola rectangulata	Nogueira, Hutchings & Carrerette, 2015	Australia, Queensland, Great Barrier Reef, Day Reef, Outer Barrier	Central Indo-Pacific	Shallow waters (12 m)	In amongst coral rubble
	Laphania boecki	Malmgren, 1866	Norway, Finmark	Temperate Northern Atlantic
	Leaena abyssorum	McIntosh, 1885	Pacific mid ocean	Eastern Indo-Pacific
	Leaena antarctica	McIntosh, 1885	Antarctic Ocean, eastern sector	Southern Ocean
	Leaena arenilega	Ehlers, 1913	Antarctic Ocean, Wilhelm II Land	Southern Ocean
	Leaena caeca	Hartman, 1960	Santa Catalina Basin, southern California	Temperate Northern Pacific
	Leaena collaris	Hessle, 1917	South Georgian part of the Southern Ocean	Southern Ocean
	Leaena ebranchiata	(M. Sars, 1865)	Norway	Temperate Northern Atlantic
	Leaena langerhansi	McIntosh, 1885	New Zeland	Temperate Australasia
	Leaena minima	Hartman, 1965	Atlantic Ocean	Tropical Atlantic
	Leaena minuta	Hartman, 1954	northern Marshall Islands	Eastern Indo-Pacific
	Leaena neozealaniae	McIntosh, 1885	Pacific Ocean, mid-ocean	Temperate Australasia
	Leaena pseudobranchia	Levenstein, 1964	Antarctic Ocean, eastern sector	Southern Ocean
	Leaena videns	Chamberlin, 1919	Laguna Beach, southern California	Temperate Northern Pacific
	Leaena wandelensis	Gravier, 1907	Antarctic Ocean, Booth Island or Port Charcot	Southern Ocean
	Loimia annulifilis	(Grube, 1872)	Fidji, Viti Levu	Central Indo-Pacific
	Loimia arborea	Moore, 1903	Off Honshu Island, Japan	Temperate Northern Pacific
	Loimia armata	Carrerette & Nogueira, 2015	Campos Basin, State of Rio de Janeiro	Tropical Atlantic	10.3-143 m.
	Loimia bandera	Hutchings, 1990	estern Pacific Ocean: Hong Kong (South China Sea)	Central Indo-Pacific	Intertidal to shallow waters (24 m)
	Loimia batilla	Hutchings & Glasby, 1988	Australia, Moreton Bay	Central Indo-Pacific
	Loimia bermudensis	Verrill, 1900	Bermuda	Tropical Atlantic
	Loimia borealis	Wang, Sui, Kou & Li, 2020	Yangkou Village, Shandong Province, China	Central Indo-Pacific	Intertidal	In mudflat
	Loimia brasiliensis	Carrerette & Nogueira, 2015	Praia de Jaguaribe, Pernambuco, northeasternBrazil	Tropical Atlantic	intertidal to 49 m	In sand, muddy sand and on corals, algae, sponges, ascidians and similar substrates
	Loimia contorta	(Ehlers, 1908)	Somali	Western Indo-Pacific
	Loimia crassifilis	(Grube, 1878)	Philippines	Central Indo-Pacific
	Loimia decora	Pillai, 1961	Sri Lanka, Tambalagam Bay	Western Indo-Pacific	Shallow waters (1.8-7.3 m)
	Loimia grubei	Holthe, 1986	Uk	Temperate Northern Atlantic
	Loimia ingens	(Grube, 1878)	Philippines	Central Indo-Pacific
	Loimia juani	Nogueira, Hutchings & Carrerette, 2015	Queensland, Great Barrier Reef, Lizard Island, Casuarina Beach, Australia	Central Indo-Pacific	Intertidal to shallow waters (9 m)	In reefs
	Loimia keablei	Nogueira, Hutchings & Carrerette, 2015	Queensland, Great Barrier Reef, Lizard Island, MacGillivray Reef, Australia	Central Indo-Pacific		In reefs
	Loimia macrobranchia	Wang, Sui, Kou & Li, 2020	Fangchenggang City, Guanxi Province, China	Central Indo-Pacific	intertidal
	Loimia medusa	(Savigny, 1822)	Gulf of Suez	Temperate Northern Atlantic
	Loimia megaoculata	Carrerette & Nogueira, 2015	Off Rio de Janeiro, Campos Basin, eastern Brazil	Tropical Atlantic	52-680 m	In sand and muddy sand
	Loimia minuta	Treadwell, 1929	Dry Tortugas, southern Florida	Tropical Atlantic
	Loimia nigrifilis	Caullery, 1944	Indonesia, Amboina and Celebes	Central Indo-Pacific
	Loimia ochracea	(Grube, 1877)	Australia, Northwest Australian Shelf	Central Indo-Pacific	Intertidal to shallow subtidal
	Loimia pseudotriloba	Nogueira, Hutchings & Carrerette, 2015	Lizard Island, Queensland, Australia, Big Vicki's Reef	Central Indo-Pacific	Intertidal to shallow waters (9 m)	In reefs
	Loimia ramzega	Lavesque, Bonifácio, Londoño-Mesa, Le Garrec & Grall, 2017	Lilia Beach, Plouguerneau, Brittany, English Channel, France	Temperate Northern Atlantic	Intertidal	In sandy beaches
	Loimia salazari	Londoño-Mesa & Carrera-Parra, 2005	Caribbean Sea	Tropical Atlantic
	Loimia savignyi	McIntosh, 1885	Cape Verde Islands	Tropical Atlantic
	Loimia triloba	Hutchings & Glasby, 1988	Australia, Queensland	Central Indo-Pacific
	Loimia tuberculata	Nogueira, Hutchings & Carrerette, 2015	Lizard Island reef on north west side of North Direction Island, Queensland, Australia	Central Indo-Pacific	Shallow waters (6-12 m)	In reefs
	Loimia turgida	Andrews, 1891	Beaufort, North Carolina, USA	Temperate Northern Atlantic	Shallow waters (shore)
	Loimia variegata	(Grube, 1869)	Red Sea	Western Indo-Pacific
	Loimia verrucosa	Caullery, 1944	Malay Archipelago	Central Indo-Pacific
	Loimia viridis	Moore, 1903	Massachusetts, Woods hole, USA	Temperate Northern Atlantic
	Longicarpus modestus	(Quatrefages, 1866)	Australia, Jervis Bay	Temperate Australasia
	Longicarpus nodus	Hutchings, 1990	Hong Kong	Central Indo-Pacific	Intertidal to shallow subtidal
	Morgana bisetosa	Nogueira & Amaral, 2001	Off São Paulo, Southeastern Brazil, Ilha de Alcatrazes	Temperate South America	Shallow waters (0-~10 m)
	Neoamphitrite affinis	(Malmgren, 1866)	Canada	Temperate Northern Atlantic
	Neoamphitrite edwardsii	(Quatrefages, 1866)	France	Temperate Northern Atlantic
	Neoamphitrite figulus	(Dalyell, 1853)	United Kingdom	Temperate Northern Atlantic
	Neoamphitrite glasbyi	Londoño-Mesa & Carrera-Parra, 2005	Mexico	Tropical Atlantic
	Neoamphitrite grayi	(Malmgren, 1866)	Canada, lower St. Lawrence estuary	Temperate Northern Atlantic
	Neoamphitrite groenlandica	(Malmgren, 1866)	Canada,Saguenay Fjord; lower St. Lawrence estuary	Temperate Northern Atlantic
	Neoamphitrite hydrothermalis	Reuscher, Fiege & Wehe, 2012	Papua, Edison Seamount, Lihir Basin, Bismarck Archipelago, Pacific Ocean	Central Indo-Pacific	1474 m
	Neoamphitrite pachyderma	(Hutchings & Glasby, 1988)	Australia, Moreton Bay	Central Indo-Pacific
	Neoamphitrite ramosissima	(Marenzeller, 1884)	Japan	Temperate Northern Pacific
	Neoamphitrite robusta	(Johnson, 1901)	Washington (State)	Temperate Northern Pacific
	Neoamphitrite sibogae	(Caullery, 1944)	Indonesia	Central Indo-Pacific
	Neoamphitrite undevigintipes	Choi, Kim & Yoon, 2020	South Korea, East Sea (Sea of Japan)	Temperate Northern Pacific	500 - 1000 m
	Neoamphitrite vigintipes	(Grube, 1869)	Red Sea	Western Indo-Pacific
	Neoleprea amoyensis	Monro, 1934	Amoy, China, Fujian	Central Indo-Pacific
	Neoleprea booligal	Hutchings, 1997	Houtman Abrolhos, Western Australia	Temperate Australasia	35-38 m
	Neoleprea californica	(Moore, 1904)	California, San Diego	Temperate Northern Pacific
	Neoleprea clavata	Mohammad, 1973	Mena Abdullah (= Mina Abdullah Refinary), Kuwait	Western Indo-Pacific	Intertidal	Under rocks
	Neoleprea japonica	Hessle, 1917	Japan	Temperate Northern Pacific
	Neoleprea macrocercus	Hutchings & Glasby, 1988	Australia, New South Wales	Temperate Australasia
	Neoleprea papilla	Hutchings & Smith, 1997	Leigh Harbor, Auckland, North Island, New Zealand	Temperate Australasia	Intertidal
	Neoleprea potiguara	Carrerette & Nogueira, 2015	Baía da Traição, Paraíba, northeastern Brazil	Tropical Atlantic	Intertidal	On rocks, associated with algae, sponges, ascidians and similar substrates
	Neoleprea spiralis	(Johnson, 1901)	USA, Puget Sound	Temperate Northern Pacific
	Neoleprea streptochaeta	(Ehlers, 1897)	Chile, Cape Horn	Temperate South America
	Nicolea amnis	Hutchings & Murray, 1984	Australia, Botany Bay, New South Wales	Temperate Australasia	Intertidal to shallow water (20 m)
	Nicolea angustiscutis	Caullery, 1944	Malay Archipelago	Central Indo-Pacific
	Nicolea armilla	Hutchings & Smith, 1997	Mathesons Bay, near Leigh, Auckland, North Island, New Zealand	Temperate Australasia	Near low tide mark (0.3-0.4 m)
	Nicolea ceciliae	Santos, Nogueira, Fukuda & Christoffersen, 2010	Rio Grande do Norte, northeastern Brazil	Tropical Atlantic	Intertidal	In sand and muddy sand
	Nicolea chilensis	(Schmarda, 1861)	Chilean part of the South Pacific Ocean	Temperate South America
	Nicolea claparedi	(Grube, 1878)	Philippines	Central Indo-Pacific
	Nicolea dasycomus	(Grube, 1866)	Saint Paul's Insel	Southern Ocean
	Nicolea gracilibranchis	(Grube, 1878)	Philippines	Central Indo-Pacific
	Nicolea gracilicauda	(Kinberg, 1866)	Tahiti	Eastern Indo-Pacific
	Nicolea incerta	Caullery, 1944	Indonesia, Lombok	Central Indo-Pacific
	Nicolea koehleri	Caullery, 1944	Borneo	Central Indo-Pacific
	Nicolea latens	Chamberlin, 1919	Pacific Ocean, Gulf of California	Temperate Northern Pacific
	Nicolea lazowasemi	Nogueira, 2008	Double Beach, Long Island Sound, Branford, New Haven County, Connecticut, USA	Temperate Northern Atlantic
	Nicolea lobulata	Hartmann-Schröder, 1965	Isla Mocha, Chile	Temperate South America	66-82 m
	Nicolea longibranchia	Caullery, 1944	Malay Archipelago	Central Indo-Pacific
	Nicolea macrobranchia	(Schmarda, 1861)	South Africa	Temperate Southern Africa
	Nicolea maxima	Augener, 1923	New Zeland, Auckland Island	Temperate Australasia
	Nicolea modesta	Verrill, 1900	Bermuda	Tropical Atlantic
	Nicolea murrayae	Nogueira, Hutchings & Carrerette, 2015	Lizard Island, Queensland, Australia	Central Indo-Pacific	Shallow waters (~4 m)	In reefs
	Nicolea profundi	Chamberlin, 1919	off Peru	Temperate South America
	Nicolea schmardai	Holthe, 1986	Sri Lanka	Western Indo-Pacific
	Nicolea simplex	Verrill, 1873	New England (USA)	Temperate Northern Atlantic
	Nicolea sinensis	Fauvel, 1932	China	Central Indo-Pacific
	Nicolea uspiana	(Nogueira, 2003)	São Paulo, Brazil	Temperate South America	Intertidal to shallow waters (~20 m)	On rocks, associated with algae, sponges, ascidians and similar substrates
	Nicolea vaili	Nogueira, Hutchings & Carrerette, 2015	Lizard Island, Queensland, Australia	Central Indo-Pacific	Shallow waters (4-15 m)	In reefs
	Nicolea venustula	(Montagu, 1819)	United Kingdom	Temperate Northern Atlantic
	Nicolea viridis	(Schmarda, 1861)	Sri Lanka	Western Indo-Pacific
	Nicolea willeyi	Caullery, 1944	Malay Archipelago	Central Indo-Pacific
	Nicolea zostericola	Örsted, 1844	Québec	Temperate Northern Atlantic
	Opisthopista sibogae	Caullery, 1944	Indonesia, Sumba Strait	Central Indo-Pacific
	Paralanice timorensis	Caullery, 1944	East Timorian Exclusive Economic Zone	Central Indo-Pacific
	Paramphitrite birulai	(Ssolowiew, 1899)	White Sea	Arctic
	Paramphitrite pauciseta	(Day, 1963)	South Africa: off the west coast of Western Cape Province	Temperate Southern Africa	146-320 m
	Paramphitrite tetrabranchia	Holthe, 1976	Sound between Sotra and Geitanger, western Norway	Temperate Northern Atlantic	55-138 m	In clay and silt with stones
	Paraxionice artifex	Fauchald, 1972	Guaymas Basin, Gulf of California, western Mexico	Temperate Northern Pacific	894 m
	Phisidia aurea	Southward, 1956	Ireland	Temperate Northern Atlantic
	Phisidia castanea	Hartmann-Schröder & Rosenfeldt, 1989	Antarctic Ocean	Southern Ocean
	Phisidia echuca	Hutchings & Glasby, 1988	South Australia	Temperate Australasia	Shallow water
	Phisidia oculata	(Langerhans, 1880)	Madeira	Temperate Australasia
	Phisidia rubra	Nogueira & Alves, 2006	Off São Paulo, southeastern Brazil	Temperate South America	Intertidal	On rocky shores, associated with algae, sponges, ascidians and similar substrates
	Phisidia rubrolineata	Hartmann-Schröder & Rosenfeldt, 1989	Antarctic Ocean, near Elephant Island	Southern Ocean
	Phisidia sagamica	Hessle, 1917	Japan	Temperate Northern Pacific
	Phisidia sanctaemariae	Hilbig, 2000	California, Off Purisima Point, Santa Maria Basin	Temperate Northern Pacific	98-492 m	In soft substrates
	Pista (Terebella) thuja	Grube in Hessle, 1917	Unknown	?
	Pista abyssicola	McIntosh, 1885	Australia, Great Australian Bight	Temperate Australasia
	Pista adriatica	Mikac & Hutchings, 2017	Adriatic Sea, 24 km off the W coast of Istrian Peninsula, on the line Poreč (Croatia)	Temperate Northern Atlantic	Shallow waters (5-37 m)
	Pista agassizi	Hilbig, 2000	California, Mendocino Escarpment	Temperate Northern Pacific
	Pista alata	Moore, 1909	California, San Diego Bay	Temperate Northern Pacific
	Pista alonsae	Santos, Nogueira, Fukuda & Christoffersen, 2010	Rio Grande do Norte, northeastern Brazil	Tropical Atlantic	Intertidal	In sand and muddy sand
	Pista americana	(Kinberg, 1866)	Rio de Janeiro, between Cabo Frio and Rio de Janeiro, eastern Brazil	Temperate South America
	Pista anneae	Nogueira, Hutchings & Carrerette, 2015	Lizard Island, Vicki's Reef, Queensland, Australia	Central Indo-Pacific	Shallow waters (5-12 m)	In reefs
	Pista anthela	Hutchings & Glasby, 1990	Enderby Island, Dampier Archipelago, Western Australia	Central Indo-Pacific	Intertidal
	Pista atypica	Hessle, 1917	Japan, Sagami Okinose	Temperate Northern Pacific
	Pista australis	Hutchings & Glasby, 1988	Australia, Merimbula	Temperate Australasia	Shallow waters (5-8 m)
	Pista bansei	Saphronova, 1988	Greenland - Norwegian Sea	Arctic
	Pista brevibranchia	Caullery, 1915	Palau Islands	Central Indo-Pacific
	Pista brevibranchiata	Moore, 1923	California,Mendocino County	Temperate Northern Pacific
	Pista breviuncinata	Hartmann-Schröder, 1965	Chile, Punta Iloca	Temperate South America	50-90 m	In silt with fine sand and many detritus
	Pista cetrata	(Ehlers, 1887)	Florida, Key West	Tropical Atlantic	intertidal to 205 m
	Pista chloroplokamia	Nogueira, Hutchings & Carrerette, 2015	Lizard Island, Queensland, Australia, Coconut Beach	Central Indo-Pacific	Intertidal to very low tide	In reefs
	Pista colini	Labrune, Lavesque, Bonifácio & Hutchings, 2019	Harbour of Banyuls-sur-Mer, France, Gulf of Lion	Temperate Northern Atlantic	Shallow waters (3 m)	In coarse sand
	Pista corrientis	McIntosh, 1885	Argentina, off Rio de la Plata	Temperate South America
	Pista cretacea	(Grube, 1860)	Mediterranean Sea	Temperate Northern Atlantic
	Pista cristata	(Müller, 1776)	Norway	Temperate Northern Atlantic
	Pista curtiuncata	Hartmann-Schröder, 1981	Cervantes, beach in front of town, Western Australia	Central Indo-Pacific	intertidal to 115 m
	Pista dibranchis	Gibbs, 1971	Solomon Islands	Central Indo-Pacific
	Pista disjuncta	Moore, 1923	California, Loma , Off San Diego	Temperate Northern Pacific
	Pista elongata	Moore, 1909	California, San Diego	Temperate Northern Pacific
	Pista estevanica	(Berkeley & Berkeley, 1942)	Vancouver Island	Temperate Northern Atlantic
	Pista expansa	(Treadwell, 1906)	Hawaiian Islands	Eastern Indo-Pacific
	Pista fasciata	(Grube, 1869)	Japan	Temperate Northern Pacific
	Pista foliigera	Caullery, 1915	Celebes Sea	Central Indo-Pacific
	Pista foliigeraformis	Annenkova, 1937	Sea of Japan	Temperate Northern Pacific
	Pista fratrella	Chamberlin, 1919	California, Laguna Beach	Temperate Northern Pacific
	Pista gibbauncinata	Saphronova, 1984	North East Pacific	Temperate Northern Pacific
	Pista godfroyi	(Gravier, 1911)	Admiralty Bay, Antarctica	Southern Ocean
	Pista grubei	Augener, 1918	Senegal,Goree Island	Tropical Atlantic
	Pista gwoyarrma	Hutchings, 1997	Australia, Frances Bay, Darwin Harbour, Northern Territory	Central Indo-Pacific	Subtidal
	Pista hataam	Londoño-Mesa, 2012	Mexico,Quintana Roo	Tropical Atlantic
	Pista herpini	Fauvel, 1928	Gulf of Mannar, Ramanathapuram District	Western Indo-Pacific
	Pista incarrientis	Annenkova, 1925	Tartar Bank, Japanese Sea	Temperate Northern Pacific
	Pista indica	Fauvel, 1940	India, Cochin State	Western Indo-Pacific
	Pista intermedia	Webster & Benedict, 1884	Massachusetts, Cape Cod, USA	Temperate Northern Atlantic
	Pista kimberliensis	Hutchings & Glasby, 1990	Shirley Island, Kimberley region, Western Australia	Central Indo-Pacific	Intertidal to shallow waters
	Pista kristiani	Nogueira, Hutchings & Carrerette, 2015	Lizard Island, north of North Point, Queensland, Australia	Central Indo-Pacific	Shallow waters (25 m)
	Pista lizae	Londoño-Mesa, 2012	Mexico, Campeche Bank	Tropical Atlantic
	Pista lornensis	(Pearson, 1969)	Scotland	Temperate Northern Atlantic
	Pista macrolobata	Hessle, 1917	Japan, Bonin	Temperate Northern Pacific
	Pista maculata	(Dalyell, 1853)	United Kingdom	Temperate Northern Atlantic
	Pista mediterranea	Gaillande, 1970	Mediterranean Sea, France	Temperate Northern Atlantic
	Pista microlobata	Hessle, 1917	Japan, Kyushu	Temperate Northern Pacific
	Pista mirabilis	McIntosh, 1885	Argentina, Rio de la Plata	Temperate South America
	Pista moorei	Berkeley & Berkeley, 1942	British Columbia, Trincomali Channel	Temperate Northern Pacific
	Pista nonatoi	Nogueira, Harris, Hutchings & Fukuda, 2011	São Paulo, southeastern Brazil	Temperate South America	Intertidal to ~150 m	In sand, muddy sand and on rocks, associated with algae, sponges, ascidians and similar substrates
	Pista obesiseta	Caullery, 1915	Malay Archipelago	Central Indo-Pacific
	Pista ortodoxa	Saphronova, 1984	Pacific	Temperate Northern Pacific
	Pista pachybranchiata	Fauvel, 1932	Laccadive Sea, Indian Ocean	Western Indo-Pacific
	Pista pacifica	Berkeley & Berkeley, 1942	Vancouver Island, British Columbia	Temperate Northern Pacific
	Pista palmata	(Verrill, 1873)	Vineyard Sound	Temperate Northern Atlantic
	Pista paracristata	Safronova, 1988	?	?
	Pista parapacifica	Hartmann-Schröder, 1965	Punta Tortuga, near Coquimbo, Chile	Temperate South America	82 m	Fine sand with mud and many detritus
	Pista patriciae	Hartmann-Schröder & Rosenfeldt, 1989	Antarctica	Southern Ocean
	Pista pectinata	Hutchings, 1977	Australia, Moreton Bay	Central Indo-Pacific
	Pista pegma	Hutchings & Smith, 1997	Mathesons Bay, near Leigh, Auckland, New Zeland	Temperate Australasia	Intertidal
	Pista pencillibranchiata	Saphronova, 1984	Pacific Ocean	Temperate Northern Pacific
	Pista percyi	Hilbig, 2000	California, off Point Estero, Santa Maria Basin	Temperate Northern Pacific
	Pista quadrilobata	(Augener, 1918)	Namibia, Swakopmund	Temperate Southern Africa
	Pista robustiseta	Caullery, 1915	Timor	Central Indo-Pacific
	Pista sibogae	Caullery, 1915	Malay Archipelago	Central Indo-Pacific
	Pista sinusa	Hutchings & Glasby, 1988	Australia, Victoria	Temperate Australasia
	Pista sombreriana	McIntosh, 1885	Caribbean Sea	Tropical Atlantic
	Pista torquata	Hutchings, 2007	New Zeland,Challenger Plateau near West Coast	Temperate Australasia	412-4540 m
	Pista trina	Hutchings, 1977	Australia, Moreton Bay	Central Indo-Pacific
	Pista trunca	Hutchings, 1977	Australia, Moreton Bay	Central Indo-Pacific
	Pista turawa	Hutchings & Glasby, 1988	Australia, New South Wales	Temperate Australasia
	Pista typha	(Grube, 1878)	Philippines, Bohol Sea	Central Indo-Pacific
	Pista unibranchia	Day, 1963	South Africa, False Bay, west coast of Western Cape Province	Temperate Southern Africa	48-60 m	Amongst khaki sand and shells
	Pista violacea	Hartmann-Schröder, 1984	Australia, Northern Territory (Darwin Harbour)	Central Indo-Pacific	Intertidal to 43 m
	Pista vossae	Londoño-Mesa, 2012	Florida, Florida Bay	Tropical Atlantic
	Pista wui	Safronova, 1988	Pacific Ocean	Temperate Northern Pacific
	Pistella franciscana	Nogueira, Hutchings & Carrerette, 2015	Lizard Island, Queensland, Australia	Central Indo-Pacific	Intertidal to 24 m	In reefs
	Pistella papillosa	(Tourtellotte & Kritzler, 1988)	Caribbean Sea (Curaçao); Gulf of Mexico (Florida	Tropical Atlantic
	Pistella rovignensis	Mikac & Hutchings, 2017	off the W coast of the Istrian peninsula, Croatia, Adriatic Sea	Temperate Northern Atlantic	6-37 m
	Polymniella aurantiaca	(Verrill, 1900)	Bermuda	Tropical Atlantic
	Proclea antarctica	Wu, Wu & Qian, 1987	Antarctica	Southern Ocean
	Proclea emmi	Annenkova, 1937	Southern part of the Tatar Strait (= Tartar Strait or Strait of Tartary)	Temperate Northern Pacific	18-58 m
	Proclea glabrolimbata	Hessle, 1917	Antarctic Ocean, Graham Land	Southern Ocean
	Proclea graffii	(Langerhans, 1884)	Madeira	Temperate Northern Atlantic
	Proclea malmgreni	(Ssolowiew, 1899)	White Sea	Arctic	2-200 m
	Pseudopista rostrata	Hutchings & Smith, 1997	Leigh Harbor, Auckland, North Island, New Zealand	Temperate Australasia	Intertidal
	Pseudoproclea australis	Hutchings & Glasby, 1990	East Montalivet Island, Kimberley region, Western Australia, Australia	Central Indo-Pacific	Shallow waters (6 m)
	Ramex californiensis	Hartman, 1944	Pacific Ocean, central California	Temperate Northern Pacific
	Reteterebella aloba	Hutchings & Glasby, 1988	Australia, New South Wales	Temperate Australasia	Under rocks in coarse sand bottoms
	Reteterebella lirrf	Nogueira, Hutchings & Carrerette, 2015	Southwest Pacific, Australia, Queensland, Great Barrier Reef, Lizard Island, Coconut Beach	Central Indo-Pacific	Shallow waters (~10 m)	In reef
	Reteterebella queenslandia	Hartman, 1963	Australia, Queensland, Heron Island	Central Indo-Pacific	Shallow waters	In reef
	Scionella japonica	Moore, 1903	off Honshu Island and Suruga Bay, Japan	Temperate Northern Pacific
	Scionella vinogradovi	(Uschakov, 1955)	Okhotsk Sea	Temperate Northern Pacific
	Scionides reticulata	(Ehlers, 1887)	Bermuda	Tropical Atlantic
	Spinosphaera barega	Nogueira & Hutchings, 2007	Long Island, Wallabi Group, Abrolhos Islands, Western Australia	Central Indo-Pacific	Shallow waters (8 m)
	Spinosphaera carrerai	Londoño-Mesa, 2003	Off Punta Herradura, Quintana Roo, southern Mexico, Caribbean Sea	Tropical Atlantic
	Spinosphaera harrisae	Londoño-Mesa, 2003	Off San Diego, California, USA	Temperate Northern Pacific	87.3 m
	Spinosphaera hutchingsae	Londoño-Mesa, 2003	Contoy Island, Quintana Roo, Mexico, Caribbean Sea	Tropical Atlantic	Shallow waters (3 m)	In old dead shell of Lobatus gigas
	Spinosphaera oculata	Hartman, 1944	Tomales Point, ocean side, central California	Temperate Northern Pacific	Intertidal	On rocky substrates
	Spinosphaera pacifica	Hessle, 1917	Uraga Channel, near Yokosuka (Miura Peninsula), Honshu Island, Japan	Temperate Northern Pacific	135 m
	Spiroverma ononokomachii	Uchida, 1968	Off the north coast of Shakotan Peninsula, Hokkaido, Japan, Sea of Japan	Temperate Northern Pacific	76 m	Among stones and peeble
	Stschapovella tatjanae	Levenstein, 1957	Arctic Ocean, Bering Sea	Arctic
	Terebella aberrans	Fauvel, 1949	Dakar, Senegal, Pointe Bernard, N'Gor	Tropical Atlantic
	Terebella alata	Grube, 1858	Puntarenas, Costa Rica	Tropical Eastern Pacific
	Terebella bilineata	Baird, 1865	Falkland Islands	Temperate South America
	Terebella biseta	Lamarck, 1801	? Unknown	?
	Terebella cancellata	Bather, 1911	? Original description not documented, according to Worms	?
	Terebella chilensis	Hartmann-Schröder, 1962	Puerto Calbuco, Chile	Temperate South America
	Terebella copia	Hutchings, 1990	Hong Kong	Central Indo-Pacific	Intertidal to shallow subtidal
	Terebella ehlersi	Gravier, 1907	Antarctica	Southern Ocean
	Terebella ehrenbergi	Grube, 1869	Indian Ocean, Red Sea	Temperate Northern Pacific
	Terebella frondosa	Grube, 1859	Puntarenas, Costa Rica	Tropical Eastern Pacific
	Terebella fulgida	Agassiz, 1851	New England (USA)	Temperate Northern Atlantic
	Terebella gigantea	Montagu, 1819	Devon, United Kingdom	Temperate Northern Atlantic
	Terebella gorgonae	Monro, 1933	Gorgona Island, Panama	Tropical Eastern Pacific
	Terebella haplochaeta	(Ehlers, 1904)	New Zeland	Temperate Australasia
	Terebella inversa	(Willey, 1905)	Gulf of Mannar	Western Indo-Pacific
	Terebella lapidaria	Linnaeus, 1767	Mediterranean Sea	Temperate Northern Atlantic
	Terebella leslieae	Santos, Nogueira, Fukuda & Christoffersen, 2010	Rio Grande do Norte, northeastern Brazil	Tropical Atlantic
	Terebella lutensis	Bather, 1911	? Original description not documented, according to Worms	?
	Terebella muliarrus	Hutchings, 1993	Rottnest Island, Western Australia	Temperate Australasia
	Terebella orotavae	(Langerhans, 1881)	Canary Islands	Temperate Northern Atlantic
	Terebella panamena	Chamberlin, 1919	Pacific Ocean, Panama	Tropical Eastern Pacific
	Terebella pappus	Hutchings & Murray, 1984	Merimbula Lake, New South Wales, Australia	Temperate Australasia	Intertidal	In sandy mud flats
	Terebella parvabranchiata	Treadwell, 1906	Hawaii	Eastern Indo-Pacific
	Terebella plagiostoma	Schmarda, 1861	Papanui Inlet, Otago Peninsula, Dunedin, South Island, New Zealand	Temperate Australasia	Intertidal
	Terebella pterochaeta	Schmarda, 1861	South Africa	Temperate Southern Africa	Intertidal
	Terebella punctata	Hessle, 1917	Japan	Temperate Northern Pacific
	Terebella quinqueseta	Lamarck, 1801	? Unknown	?
	Terebella sarsii	Grube, 1878	Philippines	Central Indo-Pacific
	Terebella schmardaei	Day, 1934	St. James, False Bay, South Africa	Temperate Southern Africa	Low water mark
	Terebella stenotaenia	Grube, 1872	Moreton Bay, Australia	Central Indo-Pacific
	Terebella subcirrata	Grube, 1872	Saint Paul's Insel, Indian Ocean	Temperate Southern Africa
	Terebella tantabiddycreekensis	Hartmann-Schröder, 1979	Tantabiddy (= Tantabiddi) Creek, Exmouth, Western Australia	Central Indo-Pacific	Intertidal to ~20 m
	Terebella tilosaula	Schmarda, 1861	Sri Lanka	Western Indo-Pacific
	Terebella verrilli	Holthe, 1986	New England, USA	Temperate Northern Atlantic
	Terebella virescens	Grube, 1869	Red Sea	Western Indo-Pacific
	Terebellobranchia hiata	(Treadwell, 1931)	Haiti	Tropical Atlantic	Intertidal to ~50 m
	Terebellobranchia hugonis	Rullier, 1972	New Caledonia	Central Indo-Pacific
	Terebellobranchia mchughae	Londoño-Mesa & Carrera-Parra, 2005	Caribbean Sea	Tropical Atlantic
	Terebellobranchia natalensis	Day, 1951	KwaZulu-Natal, South Africa	Temperate Southern Africa
	Terebellodibranchia agattiensis	Misra & Chakraborty, 1990	Agatti Island, Laccadive Islands, Lakshadweep Archipelago, India	Western Indo-Pacific	Shallow waters (2-4 m)	In coral crevices
	Thelepides koehleri	Gravier, 1911	Deception Island, Antarctica	Southern Ocean
	Thelepides malayensis	Caullery, 1944	SE Asia, off Timor	Central Indo-Pacific
	Thelepides venustus	Levenstein, 1964	Antarctic Ocean	Southern Ocean
	Tyira owensi	Hutchings, 1997	Wallabi Group, Houtman Abrolhos Islands, Western Australia	Central Indo-Pacific	39 m	In scallop beds, shells debris
	Varanusia quasimodo	(Nogueira, Hutchings & Carrerette, 2015)	Lizard Island, Queensland, Australia	Central Indo-Pacific	Shallow waters (~15 m)	In reefs, in calcareous algae and brown algae
Thelepodidae	Euthelepus aserrula	Hutchings, Nogueira & Carrerette, 2015	Martin Reef, back reef, Great Barrier Reef, Queensland, Australia	Central Indo-Pacific	Shallow water (3-15 m)	In coral rubble
	Euthelepus kinsemboensis	Augener, 1918	Kinsembo, Angola, south-east Atlantic Ocean	Central Indo-Pacific	Shallow water (12-20 m)	In muddy sand
	Euthelepus kritzleri	Londoño-Mesa, 2009	St. Petersburg, Florida, USA, Gulf of Mexico	Tropical Atlantic	43 m	In coarse sand
	Euthelepus marchinbar	Hutchings, 1997	Marchinbar Island, Northern Territory, Australia, Arafura Sea	Central Indo-Pacific	intertidal
	Euthelepus serratus	Hutchings & Glasby, 1986	Wreck Bay, New South Wales, Australia	Central Indo-Pacific	Shallow waters (until ~20 m)
	Euthelepus setubalensis	McIntosh, 1885	Off Setúbal, Portugal	Temperate Northern Atlantic	360-860 m	In green mud
	Pseudostreblosoma brevitentaculatum	Nogueira & Alves, 2006	Ubatuba, State of São Paulo, Brazil	Temperate South America	9.3-45 m	In fine sand
	Pseudostreblosoma longum	(Mohammad, 1973)	Kuwait	Western Indo-Pacific	Low tide mark	Among roots of marine vegetation
	Pseudostreblosoma serratum	Hutchings & Murray, 1984	Botany Bay, underneath Captain Cook Bridge, New South Wales, Australia	Temperate Australasia	Subtidal	In muddy sand
	Pseudothelepus binara	Hutchings, 1997	Houtman Abrolhos, Western Australia	Temperate Australasia	8-40 m	In scallop beds, medium to fine sand plus shell debris containing terebelliforms
	Pseudothelepus oligocirrus	(Schmarda, 1861)	Caribbean Sea	Tropical Atlantic
	Streblosoma abranchiata	Day, 1963	South Africa	Temperate Southern Africa	~2700-3000 m	In Globigerina ooze
	Streblosoma acymatum	Hutchings & Rainer, 1979	Australia, New South Wales, Port Jackson	Temperate Australasia	Sallow waters (0.9-8.7 m)
	Streblosoma amboinense	Caullery, 1944	Amboina, Indonesia	Central Indo-Pacific
	Streblosoma atlanticus	(Hartman & Fauchald, 1971)	New England	Temperate Northern Atlantic	1330-1470 m
	Streblosoma atos	Hutchings & Murray, 1984	Kurnell, Botany Bay, New South Wales, Australia	Temperate Australasia	Intertidal to shallow water	Amongst mangroves of Avicennia marina, in muddy sediment
	Streblosoma bairdi	(Malmgren, 1866)	Sweden	Temperate Northern Atlantic	~100 m	Amongst rocks and mud
	Streblosoma bingarra	Nogueira & Hutchings, 2007	South of Dunwich, North Stradbroke Island, Moreton Bay, Queensland, Australia	Central Indo-Pacific	Intertidal	In muddy sand flats, at low tide mark
	Streblosoma cabiochi	Lavesque, Londoño-Mesa, Daffe & Hutchings, 2020	Morlaix Bay, English Channel, France	Temperate Northern Atlantic	Shallow waters (1-17 m)	Maerl (rhodolith) beds, fine sands
	Streblosoma cespitosa	(Willey, 1905)	Sri Lanka	Western Indo-Pacific
	Streblosoma chiguensis	Hsueh & Li, 2016	Fisheries Research Institute aquarium, Sangu Village, Tainan, Taiwan western coast	Central Indo-Pacific
	Streblosoma chilensis	(McIntosh, 1885)	Chile Basin	Temperate Southern America	3950 m	In blue mud
	Streblosoma crassibranchia	Treadwell, 1914	San Clemente Island, California	Temperate Northern Pacific
	Streblosoma curvus	Hutchings, Nogueira & Carrerette, 2015	Australia, Queensland, Great Barrier Reef, Lizard Island, off Crystal Beach	Central Indo-Pacific	Shallow waters (15-28 m)	In coral rubble
	Streblosoma duplicata	Hutchings, 1990	Chek Chau, Hong Kong	Central Indo-Pacific	Shallow waters (10 m)
	Streblosoma dytikos	Hutchings & Glasby, 1990	renchman's Bay, King George Sound, Western Australia	Central Indo-Pacific	Intertidal to ~20 m
	Streblosoma gracile	Caullery, 1944	SE Asia, Sulu Sea	Central Indo-Pacific
	Streblosoma hartmanae	Kritzler, 1971	Florida, Alligator Point	Tropical Atlantic
	Streblosoma hesslei	Day, 1955	Robberg, Plettenberg Bay, South Africa, Indian Ocean	Temperate Southern Africa	Intertidal	On sea-shore
	Streblosoma hutchingsae	Lezzi & Giangrande, 2019	Torre Inserraglio, Ionian Sea, Italy	Temperate Northern Atlantic	3m	On hard bottom
	Streblosoma intestinale	M. Sars in G.O. Sars, 1872	Drøbak, Christianiafjorden [Oslo Fjord], Norway	Temperate Northern Atlantic
	Streblosoma japonica	Hessle, 1917	Japanese Sea	Temperate Northern Pacific	Shallow waters (10 m)
	Streblosoma kaia	Reuscher, Fiege & Wehe, 2012	Fiji Islands	Central Indo-Pacific	~2000 m	In hydrothermal vents
	Streblosoma latitudinis	Hutchings & Murray, 1984	Port Stephens, New South Wales, Australia	Temperate Australasia	Intertidal	In Posidonia seagrass beds
	Streblosoma lindsayae	Lavesque, Londoño-Mesa, Daffe & Hutchings, 2020	France,Northern Bay of Biscay, NE Atlantic	Temperate Northern Atlantic	52 m	In muddy sand
	Streblosoma longifilis	Rioja, 1962	Mexico	Tropical Atlantic
	Streblosoma longiremis	Caullery, 1915	Malay Archipelago	Central Indo-Pacific	960 m
	Streblosoma maligirrima	Hutchings, 1997	Shell Island, East Arm, Darwin Harbour, Northern Territory, Australia, Timor Sea	Central Indo-Pacific	Intertidal	On rocky substrates
	Streblosoma minutum	Hutchings & Glasby, 1987	Minnie Water, New South Wales, Australia	Temperate Australasia	Intertidal	In shore reefs, underneath boulders in rock pool
	Streblosoma nogueirai	Lezzi & Giangrande, 2019	Torre Guaceto, Adriatic Sea, Italy	Temperate Northern Atlantic	Shallow waters (3 m)	On hard bottoms
	Streblosoma oligobranchiatum	Nogueira & Amaral, 2001	Ilha de Alcatrazes, State of São Paulo, Brazil	Temperate South America	Shallow waters low tide mark to ~15-20m	On rocky shores, in colonies of the stony coral Mussismilia hispida
	Streblosoma pacifica	Hilbig, 2000	Western Santa Barbara Channel, California	Temperate Northern Pacific	443 m	In soft substrates
	Streblosoma patriciae	Santos, Nogueira, Fukuda & Christoffersen, 2010	Rio Grande do Norte, northeastern Brazil	Tropical Atlantic	Intertidal	In muddy sand banks, exposed at low tides
	Streblosoma persica	(Fauvel, 1908)	Persian Gulf, Gulf of iran	Western Indo-Pacific
	Streblosoma porchatensis	Nogueira, Garraffoni & Alves, 2004	Ilha Porchat, São Paulo, southeastern Brazil	Temperate South America	Intertidal to shallow water	On rocky shores, among algae, ascidians, sponges and similar substrates
	Streblosoma prora	Hutchings & Glasby, 1987	Halifax Bay, North of Townsville, Queensland, Australia	Central Indo-Pacific	shallow subtidal	In muddy sand
	Streblosoma pseudocomatus	Lezzi & Giangrande, 2019	Ionian Sea	Temperate Northern Atlantic	Shallow waters (3 m)	On artificial substrates
	Streblosoma quadridentatum	Caullery, 1944	Macassar, East Indies	Central Indo-Pacific
	Streblosoma sinica	Wu, Wu & Qian, 1987	Antarctic Ocean	Southern Ocean
	Streblosoma spiralis	(Verrill, 1874)	Maine, Florida, USA	Tropical Atlantic	~100-200 m	In mud
	Streblosoma tenhovei	Londoño-Mesa, 2009	Sint Joris Baai, Curaçao, Lesser Antilles, Caribbean Sea	Tropical Atlantic	Shallow waters (1-3 m)	In sand with rock debris and Thalassia beds
	Streblosoma toddae	Hutchings & Smith, 1997	Leigh Harbor, Auckland, North Island, New Zealand	Temperate Australasia	Low intertidal	Undersides of rocks, and between wedged or impacted boulders, with mud
	Streblosoma uncinatus	Kudenov, 1975	Gulf of California (Sonora, Mexico)	Tropical Atlantic	Low water mark	In sandy crevices
	Streblosoma variouncinatum	Hartmann-Schröder & Rosenfeldt, 1991	Antarctic Ocean	Southern Ocean
	Streblosoma wuchiensis	Hsueh & Li, 2016	Wuchi fishing port,Taichung, Taiwan western coast	Central Indo-Pacific	Intertidal to shallow waters	Among epifauna on docks
	Streblosoma xiangyanghong	Wu, Wu & Qian, 1987	Antarctic Ocean	Southern Ocean
	Thelepus abranchiatus	(Hartman & Fauchald, 1971)	New England	Temperate Northern Atlantic	2022 m
	Thelepus abyssorum	Caullery, 1944	East Indies	Central Indo-Pacific
	Thelepus alatus	Hutchings & Glasby, 1987	Leeward side of Lizard Island, off Chinamans Beach, Queensland, Australia	Central Indo-Pacific	7 m	Amongst blocks of Porites
	Thelepus ambitus	Glasby & Hutchings, 1987	Punta Arenas, Chile, Straits of Magellan	Temperate South America
	Thelepus angustitoris	Caullery, 1944	East Indies	Central Indo-Pacific
	Thelepus antarcticus	Kinberg, 1866	Antarctic Ocean	Southern Ocean
	Thelepus australiensis	Hutchings & Smith, 1997	Victor Harbor, South Australia, Australia	Temperate Australasia	Intertidal to 5 m	Under stones, among algae, including calcareous algae, in reefal areas
	Thelepus binakayensis	Pillai, 1965	Philippines	Central Indo-Pacific
	Thelepus boja	Hutchings & Glasby, 1987	Gabo Island, Victoria, Australia	Temperate Australasia	10-30 m
	Thelepus branchiatus	Treadwell, 1906	Molokai, Hawaii	Eastern Indo-Pacific	~250 m	In coral sand, shells and foraminiferans
	Thelepus brevicauda	Hutchings & Glasby, 1987	Gabo Island, Victoria, Australia	Temperate Australasia	Intertidal to 20 m
	Thelepus brevitori	Carrerette, Nogueira & Hutchings, 2017	Off São Paulo, southeastern Brazil	Temperate South America	25.3-50 m	In sand
	Thelepus cincinnatus	(Fabricius, 1780)	Greenlandic part of the Arctic Ocean	Arctic	36.4 m	On solid rock bottom
	Thelepus comatus	(Grube, 1859)	Punta Arenas, Chile	Temperate South America
	Thelepus corsicanus	Lavesque, Londoño-Mesa, Daffe & Hutchings, 2020	France, Corsica Cape	Temperate Northern Atlantic	Shallow waters (16-29 m)	Among rocks
	Thelepus crassibranchiatus	Treadwell, 1901	Off Custom House, Mayagüez Harbor, Puerto Rico	Tropical Atlantic	402-411 m
	Thelepus crispus	Johnson, 1901	Washington to California	Temperate Northern Pacific
	Thelepus davehalli	Jirkov, 2018	Off Faroe Islands	Arctic	79-495 m
	Thelepus dubius	Caullery, 1944	Malay Archipelago	Central Indo-Pacific
	Thelepus extensus	Hutchings & Glasby, 1987	West Island, South Australia	Temperate Australasia	Intertidal to 50 m
	Thelepus fraggleorum	Capa & Hutchings, 2006	Jicarita Island, Coiba National Park, Panama	Tropical Eastern Pacific	Low water mark to ~15 m	On gorgonians
	Thelepus haitiensis	Treadwell, 1931	Lamentin Reefs, near shore, 5.6 km West of Bizoton reefs, southern region of Bay of Port-au-Prince, Gulf of Gonâve, Haiti	Tropical Atlantic	Shallow waters
	Thelepus hamatus	Moore, 1905	Yes Bay, Alaska	Arctic	330 m	In green mud
	Thelepus hemeiensis	Hsueh & Li, 2017	Hemei, New Taipei City, Taiwan	Central Indo-Pacific	Intertidal	Under rocks, in fine sand
	Thelepus japonicus	Marenzeller, 1884	Japan	Temperate Northern Pacific
	Thelepus laeviseta	(Hartmann-Schröder, 1962)	Chile	Temperate South America	Shallow waters	In rock pools covered with actinians
	Thelepus leptoplocamus	(Grube, 1878)	Philippines	Central Indo-Pacific
	Thelepus longtongensis	Hsueh & Li, 2016	Tawain	Central Indo-Pacific	Shallow waters (2 m)	On hard bottoms
	Thelepus malayensis	(Caullery, 1944)	Malay Archipelago	Central Indo-Pacific	960 m
	Thelepus marenzelleri	McIntosh, 1885	Japan	Temperate Northern Pacific	~1400 m	In green mud
	Thelepus marthae	Jirkov, 2018	Norwegian Sea	Temperate Northern Atlantic	95-1510 m
	Thelepus mcintoshi	Grube, 1877	Kerguelen Islands	Southern Ocean
	Thelepus megalabiatum	Carrerette, Nogueira & Hutchings, 2017	Off Rio de Janeiro, Campos Basin, eastern Brazil	Tropical Atlantic	15-48.2 m	In sand
	Thelepus microbranchiatus	Caullery, 1944	East Indies	Central Indo-Pacific
	Thelepus natans	Kinberg, 1867	Off the mouth of La Plata River, Argentina	Temperate South America
	Thelepus nucleolata	(Claparède, 1869)	Gulf of Naples (Italy)	Temperate Northern Atlantic
	Thelepus opimus	Hutchings, 1990	Hong Kong Peng Chau Mirs Bay 1	Central Indo-Pacific	Shallow waters (5-10 m)
	Thelepus paiderotos	Hutchings, Nogueira & Carrerette, 2015	Australia, Queensland, Great Barrier Reef, Lizard Island, Casuarina Beach	Central Indo-Pacific	Shallow waters (3-15 m)	Amongst coral rubble, in back reef
	Thelepus parapari	Jirkov, 2018	Playa de los Genoveses, Cabo de Gata, Almería, Andalusía, Spain	Temperate Northern Atlantic	Shallow waters (2-15 m)	Between rhizomes of Posidonia, coralligenous formations, calcareous concretions and under stones
	Thelepus parcus	(Grube, 1878)	Philippines	Central Indo-Pacific
	Thelepus pascua	(Fauchald, 1977)	Galera Reef, Panama	Tropical Atlantic	Intertidal	Laurencia zone on a dead coral reef
	Thelepus paucibranchis	(Grube, 1878)	Philippines	Central Indo-Pacific
	Thelepus pequenianus	Augener, 1918	Luderitz Bay, Namibia	Temperate Southern Africa	Low water mark to ~10 m
	Thelepus pericensis	Chamberlin, 1919	Panama	Tropical Eastern Pacific
	Thelepus praecox	Hutchings & Glasby, 1987	Off Wollongong, New South Wales, Australia	Temperate Australasia	274-278 m
	Thelepus pulvinus	Hutchings, 1990	Hong Kong	Central Indo-Pacific	2-15 m
	Thelepus robustus	(Grube, 1878)	Philippines	Central Indo-Pacific	Intertidal to shallow waters
	Thelepus setosus	(Quatrefages, 1866)	France, Saint-Vaast-la-Hougue	Temperate Northern Atlantic
	Thelepus taamensis	Caullery, 1944	East Indies	Central Indo-Pacific
	Thelepus taiwanensis	Hsueh & Li, 2016	off eastern Taiwan	Central Indo-Pacific	765–806 m	In sediment
	Thelepus tenuis	(Verrill, 1900)	Bermuda	Tropical Atlantic
	Thelepus thoracicus	(Grube, 1869)	Red Sea	Western Indo-Pacific
	Thelepus toyamaensis	Okuda, 1936	Toyama Bay, Japan	Temperate Northern Pacific
	Thelepus triserialis	(Grube, 1855)	Mediterranean sea	Temperate Northern Atlantic	Intertidal	In coral reefs
	Thelepus vaughani	Gravier, 1906	Djibouti, Gulf of Aden	Western Indo-Pacific
	Thelepus verrilli	(Treadwell, 1911)	Gulf of Mexico, Fort Jefefrson	Tropical Atlantic	Intertidal to shallow water	In crevices in dead corals
	Thelepus wuchiensis	Hsueh & Li, 2017	Wuchi fishing port, Taichung City, Taiwan	Central Indo-Pacific	intertidal to shallow water	On clusters of sessile biota, including algae, sea anemones, barnacles, ectoproctans, bivalves, solitary tunicates and sponges attached to the boat docks
Trichobranchidae	Octobranchus antarcticus	Monro, 1936	Schollaert Channel, Palmer Archipelago, Antarctica, 64°21'0"S 62°58'0"W	Southern Ocean	278-500 m	In mud
	Octobranchus floriceps	Kingston & Mackie, 1980	Hutton Oilfield, Northern North Sea, 61.075 N, 1.45 E	Temperate Northern Atlantic	145-370 m
	Octobranchus japonicus	Hessle, 1917	Japanese Economic Exclusive Zone	Temperate Northern Pacific	150-200 m
	Octobranchus lingulatus	(Grube, 1863)	Mediterranean Sea	Temperate Northern Atlantic
	Octobranchus longipes	Blankensteyn & Lana, 1987	Off southeastern Brazil	Temperate South America	32-53 m	In sand and muddy sand
	Octobranchus myunus	Hutchings & Peart, 2000	Hole-in-the-wall, Jervis Bay, New South Wales, Australia	Temperate Australasia	?
	Octobranchus pacificus	(Berkeley & Berkeley, 1954)	Buccaneer Bay, British Columbia, Canada	Temperate Northern Pacific
	Octobranchus phyllocomus	Hartman, 1952	Ross Island, Antarctica	Southern Ocean	90 m
	Octobranchus sexlobatus	Hartmann-Schröder & Rosenfeldt, 1989	Antarctica	Southern Ocean
	Octobranchus sikorskii	(Leontovich & Jirkov in Jirkov, 2001)	Arctic ocean	Arctic
	Terebellides abyssalis	(Hartman, 1965)	Hatteras abyssal plain, off New England, USA, 35°35'N 67°25'W	Temperate Northern Atlantic	4743-5023 m
	Terebellides africana	Augener, 1918	Equatorial Guinean Economic Exclusive Zone	Tropical Atlantic
	Terebellides akares	Hutchings, Nogueira & Carrerette, 2015	Reef flat at south end of Coconut Beach, Lizard Island, Queensland, Australia, 14º41'42.120''S 145º28'11.280''E	Central Indo-Pacific	Intertidal	Amongst coral rubble
	Terebellides anguicomus	Müller, 1858	Ilha de Santa Catarina (= Florianópolis), Santa Catarina, Brazil.	Temperate South America	Low tide mark to ~35m
	Terebellides atlantis	Williams, 1984	Off New England, USA	Temperate Northern Atlantic
	Terebellides augeneri	Parapar, Martin & Moreira, 2020	Off Northern Angola, 7°03.2562’S 12°21.8513’E	Temperate Southern Africa	73 m
	Terebellides bakkeni	Parapar, Capa, Nygren & Moreira, 2020	Nordland, Sortlaandssunder (Lofoten Islands), Norway	Temperate Northern Atlantic	102-370 m	In muddy bottoms
	Terebellides baliensis	Hsueh & Li, 2017	Bali, New Tapei City, Taiwan, China, 25.1931°, 121.3594°	Central Indo-Pacific	Shallow waters subtidal	In muddy bottoms
	Terebellides banalis	Schüller & Hutchings, 2012	NW off Rio Grande Rise	Temperate South America	4477-4484.4 m	In oligotrophic fine sediments
	Terebellides biaciculata	Hartmann-Schröder, 1992	Lagoon side of Rangiroa Atoll, probably near Kia Ora village, Tuamotu Islands, -14.965°, -147.637°	Central Indo-Pacific	Intertidal	Lagoon side of atolls, among calcareous algae and corals
	Terebellides bigeniculatus	Parapar, Moreira & Helgason, 2011	GIF Ridge, NW Iceland, 67.214722 N -22.429444 W	Temperate Northern Atlantic	333 m
	Terebellides bisetosa	Hartmann-Schröder, 1965	Golfo de Ancud, Chile, -42.00º -73.0083º	Temperate South America	264 m	In silt
	Terebellides bonifi	Lavesque, Hutchings, Daffe, Nygren & Londoño-Mesa, 2019	Gulf of Lion, Mediterranean Sea, 42°32′39″N 3°16′3″ E	Temperate Northern Atlantic	90 m
	Terebellides brevis	Imajima & Williams, 1985	Suruga Bay, Honshu Island, Japan, 34º46.0'N 138º42.3'E -- 34º46.5'N 138º42.4'E	Temperate Northern Pacific	88-314 m
	Terebellides bulbosa	Schüller & Hutchings, 2012	Brazil Basin	Tropical Atlantic	~4500-5200 m	In oligotrophic fine sediments
	Terebellides californica	Williams, 1984	Southern California, USA	Temperate Northern Pacific
	Terebellides canopus	Schüller & Hutchings, 2013	Eastern margin of Weddell Sea, Antarctica, 71°18.42'S 13°58.21'W	Southern Ocean	1047 m
	Terebellides carmenensis	Solis-Weiss, Fauchald & Blankensteyn, 1991	Gulf of Mexico, Mexico, Campeche, Isla Del Carmen, Boca del Puerto Real, San Julian, at the entrance of Laguna de Términos (estimated 18.754º N, -91.511ºW)	Tropical Eastern Pacific	Near low tide mark	In muddy sand sediments associated with mangrove vegetation
	Terebellides ceneresi	Lavesque, Hutchings, Daffe, Nygren & Londoño-Mesa, 2019	Bay of Biscay, Near Capbreton Canyon, France, 43°33′31″N 1°43′49″W	Temperate Northern Atlantic	112 m
	Terebellides concertina	Schüller & Hutchings, 2012	Argentine Basin	Temperate South America	~4500 m	In nutrient rich sediments, with high fractions of foraminiferan shells and relatively coarse grain sizes
	Terebellides congolanus	Parapar, Martin & Moreira, 2020	Off Congo, paratype from Pointe Noire, 4°59.109’S 11°49.387’E	Tropical Atlantic	47-167 m
	Terebellides crux	Schüller & Hutchings, 2013	Northern Weddell Sea, Antarctica, 63°38.27'S 50°37.16'W	Southern Ocean	2668 m
	Terebellides distincta	Williams, 1984	Off New England, USA	Temperate Northern Atlantic
	Terebellides diva	Schüller & Hutchings, 2012	Brazil Basin	Tropical Atlantic	~5200 m	In oligotrophic fine sediments
	Terebellides ectopium	Zhang & Hutchings, 2018	off Zhanjiang, Guangdong, Baibu Gulf, China, 20.4099° N 109.7840°E	Central Indo-Pacific	Shallow waters (17.5 m)	In mud
	Terebellides ehlersi	McIntosh, 1885	Fiji Basin	Central Indo-Pacific	~250 m	In coral mud
	Terebellides europaea	Lavesque, Hutchings, Daffe, Nygren & Londoño-Mesa, 2019	Bay of Brest, Brittany, 48°18′55″N 4°21′54″W	Temperate Northern Atlantic	1.3 m
	Terebellides eurystethus	Chamberlin, 1919	Off Colombia, Ecuador and Peru	Tropical Eastern Pacific	~1500-4750 m	In green sand and fine grey radiolarian ooze
	Terebellides fauveli	Parapar, Martin & Moreira, 2020	Off Ivory Coast, 4º38’N 6º18’W	Tropical Atlantic	80-90 m
	Terebellides gentili	Lavesque, Hutchings, Daffe, Nygren & Londoño-Mesa, 2019	Morlaix Bay, Pierre Noire, near Roscoff, Brittany, France, 48°42′30″N 3°51′58″W	Temperate Northern Atlantic	17 m
	Terebellides gingko	Schüller & Hutchings, 2012	Brazil Basin	Tropical Atlantic	~5200 m	In oligotrophic fine sediments
	Terebellides gracilis	Malm, 1874	Norwegian Exclusive Economic Zone	Temperate Northern Atlantic
	Terebellides gralli	Lavesque, Hutchings, Daffe, Nygren & Londoño-Mesa, 2019	Bay of Brest, Brittany, France, 48°18′31″N 4°21′56″W	Temperate Northern Atlantic	Shallow waters (1 m)
	Terebellides guangdongensis	Zhang & Hutchings, 2018	Near Nanao Island, Guangdong, China, 23.4982°N 117.2546°E	Central Indo-Pacific	15 m
	Terebellides horikoshii	Imajima & Williams, 1985	Suruga Bay, Honshu Island, Japan, 34º55.6'N 138º40.3'E -- 34º55.3'N 138º40.0'E	Temperate Northern Pacific	~1000 m
	Terebellides hutchingsae	Parapar, Moreira & Martin, 2016	Gulf of Thailand, 07.6692ºN 102.8542ºE	Central Indo-Pacific	45-78 m	In mud
	Terebellides intoshi	Caullery, 1915	Southeastern Asia	Central Indo-Pacific
	Terebellides irinae	Gagaev, 2009	Canada Basin, Arctic Ocean, 73°04'N 157°12'W	Arctic	2570-2678 m
	Terebellides japonica	Moore, 1903	Sagami Bay, Japan, estimated 35°15'N, 139°25'E	Temperate Northern Pacific	~300 m
	Terebellides jitu	Schüller & Hutchings, 2010	Arafura Sea, Papua New Guinea, 9°48.46'S 133°15.24'E	Central Indo-Pacific	158 m
	Terebellides jorgeni	Hutchings, 2007	South of Bali, Indonesia, -8.8333 114.9167	Central Indo-Pacific	600 m	In sandy clay
	Terebellides kerguelensis	McIntosh, 1885	Kerguelen Islands	Southern Ocean
	Terebellides kirkegaardi	Parapar, Martin & Moreira, 2020	Bota, Cameroon	Tropical Atlantic	Shallow water (8-9 m)
	Terebellides klemani	Kinberg, 1867	Brazilian Economic Exclusive Zone	Temperate South America	36-73 m
	Terebellides kobei	Hessle, 1917	Kobe Bay, Japan	Temperate Northern Pacific	7-15 m
	Terebellides koreni	Hansen, 1882	Brazilian Economic Exclusive Zone	Tropical Atlantic	˜5-75 m
	Terebellides kowinka	Hutchings & Peart, 2000	Middle Banks, Moreton Bay, Queensland, Australia	Central Indo-Pacific
	Terebellides lanai	Solis-Weiss, Fauchald & Blankensteyn, 1991	Atlantic Ocean, Brazil, off State of São Paulo, 24º16'00''S 46º01'02''W	Temperate South America	29-50 m
	Terebellides lilasae	Lavesque, Hutchings, Daffe, Nygren & Londoño-Mesa, 2019	West Gironde Mud Patch, Bay of Biscay, 45°38’55”N 01°45’47”W	Temperate Northern Atlantic	62m
	Terebellides lineata	Imajima & Williams, 1985	Sagami-Nada, Honshu, Japan, 34º54.5'N 139º19.7'E -- 34º54.5'N 139º20.0'E)	Temperate Northern Pacific	314-1650 m
	Terebellides lobatus	Hartman & Fauchald, 1971	Off New England, USA	Temperate Northern Atlantic
	Terebellides longicaudatus	Hessle, 1917	South Georgia	Southern Ocean	75-310 m
	Terebellides longisetus	Parapar, Martin & Moreira, 2020	Off Equatorial Guinea, 2º09’N 9º27’E	Tropical Atlantic	260-650 m
	Terebellides malvinensis	Bremec & Elias, 1999	SW Atlantic Ocean, Argentina shelf, offshore of Mar de la Plata, -38.7333° -56.2167°.	Temperate South America	87-152 m	In sand
	Terebellides mediterranea	Parapar, Mikac & Fiege, 2013	45° 17.0' N 13° 16.0' E, North Adriatic Sea	Temperate Northern Atlantic	31 m
	Terebellides mira	Schüller & Hutchings, 2013	Northwestern Weddell Sea, 65°20.27'S 54°12.54'W, Antarctica	Southern Ocean	1166 m
	Terebellides moori	Hessle, 1917	Alaska, USA	Temperate Northern Pacific
	Terebellides mundora	Hutchings & Peart, 2000	Bass Strait, Victoria, Australia	Temperate Australasia
	Terebellides narribri	Hutchings & Peart, 2000	Peel Island, Moreton Bay, Queensland, Australia	Central Indo-Pacific
	Terebellides nkossa	Parapar, Martin & Moreira, 2020	off Equatorial Guinea, 1º19.82’ 8º43.8’	Tropical Atlantic	43 m
	Terebellides norvegica	Parapar, Capa, Nygren & Moreira, 2020	Roagland, Norway	Temperate Northern Atlantic	190-1268 m	In muddy soft bottoms
	Terebellides pacifica	Kinberg, 1867	Society Islands	Eastern Indo-Pacific	Low tide mark	Among corals
	Terebellides parapari	Lavesque, Hutchings, Daffe, Nygren & Londoño-Mesa, 2019	Near Capbreton Canyon, Bay of Biscay, France, 43°33′26″N 1°41′37″W	Temperate Northern Atlantic	112 m
	Terebellides parvus	Solis-Weiss, Fauchald & Blankensteyn, 1991	Twin Cays, Belize, Caribbean Sea, estimated 16.832ºN -88.108ºW	Tropical Atlantic	Low tide mark	Root mat of Rhizophora mangle, covered with Caulerpa verticillata
	Terebellides paulina	(Grube, 1871)	Saint Paul Island	Temperate Southern Africa	47 m
	Terebellides persiae	Parapar, Moreira, Gil & Martin, 2016	Tonback, Iran, Persian Gulf, 27º42.510'N 52º10.820'E	Western Indo-Pacific	10-110 m	In silty sand
	Terebellides ramili	Parapar, Martin & Moreira, 2020	Offshore near (South of ) Pointe-Noire, Republic of Congo, 5°16.285’S 11°33.568’E	Tropical Atlantic	190 m
	Terebellides reishi	Williams, 1984	Southern California, USA	Temperate Northern Pacific
	Terebellides resomari	Lavesque, Hutchings, Daffe, Nygren & Londoño-Mesa, 2019	Dunkirk/Dunkerque harbour, English Channel, France, 51°2'52"N 2°21'14"E	Temperate Northern Atlantic	10 m
	Terebellides rigel	Schüller & Hutchings, 2013	Eastern margin of Weddell Sea, Antarctica, 71°09.52'S 14°00.76'W	Southern Ocean	2182 m
	Terebellides sepultura	Garraffoni & Lana, 2003	Offshore Santa Catarina, Brazil, 27º09.51'S 47º04.85'W	Temperate South America	102-350 m	In muddy bottoms
	Terebellides shetlandica	Parapar, Moreira & O'Reilly, 2016	NW Hutton Oilfield, between Shetland Islands and Norway	Temperate Northern Atlantic	160 m
	Terebellides sieboldi	Kinberg, 1867	Bangka Strait, Indonesia	Central Indo-Pacific		In muddy dark sand
	Terebellides sirius	Schüller & Hutchings, 2013	Northwestern Weddell Sea, Antarctica, 65°17.77'S 54°00.00'W	Southern Ocean	2086 m
	Terebellides strepsibranchis	(Grube, 1871)	Brazilian Economic Exclusive Zone WHERE IN BRAZIL. NEVER HEARD OF THIS SPECIES, IS IT VALID?	Temperate South America
	Terebellides stroemii	Sars, 1835	Bergensfjord, Norway, neotypes from 60 37'15''N 05 02'00''E	Temperate Northern Atlantic	115-338 m	In sandy and muddy sand bottoms
	Terebellides toliman	Schüller & Hutchings, 2013	Eastern Weddell Sea, Antarctica, 70°35.29'S 9°2.89'W	Southern Ocean	486-488 m
	Terebellides totae	Bremec & Elias, 1999	Bahía Blanca, Argentina, -38.9ºS -62.1972ºW	Temperate South America	4-20 m
	Terebellides umbella	Grube, 1869	Red Sea	Western Indo-Pacific
	Terebellides vanhoeffeni	(Ehlers, 1913)	Southern Ocean	Southern Ocean	2725 m
	Terebellides woolawa	Hutchings & Peart, 2000	Peel Island, Moreton Bay, Queensland, Australia	Central Indo-Pacific
	Terebellides yangi	Zhang & Hutchings, 2018	Weizhou Island, Guangxi, Beibu Gulf, China, 20.6462° N 108.9855° E	Central Indo-Pacific	35 m
	Trichobranchus alatus	Hartmann-Schröder, 1965	Galera, Chile, -39.9983º, -74.025º	Temperate South America	260 m	Silt with fine sand, detritus, and some stones.
	Trichobranchus americanus	Hartman, 1965	Off New England, USA	Temperate Northern Atlantic	300-2000 m
	Trichobranchus bibranchiatus	Moore, 1903	Japanese Economic Exclusive Zone	Temperate Northern Pacific
	Trichobranchus bunnabus	Hutchings & Peart, 2000	Cape Banks, New South Wales, Australia	Temperate Australasia
	Trichobranchus demontaudouini	Lavesque, Hutchings, Daffe, Nygren & Londoño-Mesa, 2019	Near Capbreton Canyon, Bay of Biscay, Northeast Atlantic Ocean, France, 43°33′26″N 1°41′37″W	Temperate Northern Atlantic	112 m
	Trichobranchus dibranchiatus	(Knox & Cameron, 1971)	Port Phillip Bay, Victoria, Australia	Temperate Australasia
	Trichobranchus drewi	Nogueira, 2008	70 km SE of Martha’s Vineyard, USA, 40°34'N 70°51'W	Temperate Northern Atlantic	71.4 m	In muddy bottom
	Trichobranchus glacialis	Malmgren, 1866	Spitsbergen, Arctic Ocean	Arctic	45-55 m	In argilous bottoms
	Trichobranchus gooreekis	Hutchings & Peart, 2000	North Point, Central Bass Starit, Victoria	Temperate Australasia
	Trichobranchus hancocki	(Hartman, 1955)	Southern California, USA	Temperate Northern Pacific	~20-90 m	In green muddy sand
	Trichobranchus hirsutus	Hutchings, Nogueira & Carrerette, 2015	Lizard Island, Queensland, Australia	Central Indo-Pacific	Intertidal	Amongst coral rubble on coral reef flat
	Trichobranchus lobiungens	Hessle, 1917	Off Uruguay	Temperate South America	80m
	Trichobranchus polychaetus	Wang & Wu, 1988	Antarctica	Southern Ocean
	Trichobranchus roseus	(Malm, 1874)	Swedish Economic Exclusive Zone	Temperate Northern Atlantic
	Trichobranchus torulosus	(Hutchings & Peart, 2000)	Halifax Bay, Townsville, Queensland, Australia	Central Indo-Pacific
	Trichobranchus tribranchiatus	(Hutchings & Peart, 2000)	Long Beach, Jervis Bay, New South Wales, Australia	Temperate Australasia

## Sheet: Deepest
Family	Species	Depth
Alvinellidae	Paralvinella hessleri	3595
Ampharetidae	Anobothrus auriculatus	5120–9584
Pectinariidae	Petta williamsonae Zhang, Hutchings & Kupriyanova, 2019	2760
Polycirridae	Biremis blandi Polloni, Rowe & Teal, 1973	597
Telothelepodidae	Rhinothelepus mexicanus (Hutchings & Glasby, 1986)	91
Terebellide s.l.	Pista torquata Hutchings, 2007	4540
Thelepodidae	Thelepus abranchiatus (Hartman & Fauchald, 1971)	2022
Trichobranchidae	Terebellides gingko Schüller & Hutchings, 2012	5180

## Sheet: Realms
	Arctic	Temperate Northern Atlantic	Temperate Northern Pacific	Tropical Atlantic	Western Indo-Pacific	Central Indo-Pacific	Eastern Indo-Pacific	Tropical Eastern Pacific	Tropical Northern Pacific	Temperate South America	Temperate Soutern Africa	Temperate Australasia	Southern Ocean
Alvinellidae	0	0	5	0	0	3	0	2		0	0	0	0
Ampharetidae	19	72	83	9	5	32	3	18		11	13	2	34
Pectinariidae	2	8	10	4	4	20	0	2		5	3	6	1
Polycirridae	2	27	8	14	4	29		2	3	5	1	13	6
Telothelepodidae		1		4	1	5				3	2	3
Terebellidae s.l.	7	60	49	35	21	91	5	9		23	13	36	20
Thelepodidae	3	16	7	18	5	36	1	2		3	3	11	5
Trichobranchidae	3	23	12	8	2	17	1	2		11	2	6	13
TOTAL	36	207	174	92	42	233	10	37	3	61	37	77	79
